# Supplementary material for: Variation in cardiovascular disease care: an Australian cohort study on sex differences in receipt of coronary procedures
Source: PubMed Central journal article supplement — BMJ Open. 2019 Jul 23;9(7):e026507. doi: 10.1136/bmjopen-2018-026507 (PMC6661610; doi:10.1136/bmjopen-2018-026507), 2019-07-23
Supplement: bmjopen-2018-026507.draft_revisions.pdf [file bmjopen-2018-026507.draft_revisions.pdf]

# BMJ Open

BMJ Open is committed to open peer review. As part of this commitment we make the peer review history of every article we publish publicly available.

When an article is published we post the peer reviewers' comments and the authors' responses online. We also post the versions of the paper that were used during peer review. These are the versions that the peer review comments apply to.

The versions of the paper that follow are the versions that were submitted during the peer review process. They are not the versions of record or the final published versions. They should not be cited or distributed as the published version of this manuscript.

BMJ Open is an open access journal and the full, final, typeset and author-corrected version of record of the manuscript is available on our site with no access controls, subscription charges or pay-per-view fees (<http://bmjopen.bmj.com>).

If you have any questions on BMJ Open's open peer review process please email [info.bmjopen@bmj.com](mailto:info.bmjopen@bmj.com)

# BMJ Open

## Variation in cardiovascular disease care: An Australian cohort study on gender inequalities in receipt of coronary procedures.

|                               |                                                                                                                                                                                                                                                                                                                                                                                                                                                                                                                                                                                                                                                                                         |
|-------------------------------|-----------------------------------------------------------------------------------------------------------------------------------------------------------------------------------------------------------------------------------------------------------------------------------------------------------------------------------------------------------------------------------------------------------------------------------------------------------------------------------------------------------------------------------------------------------------------------------------------------------------------------------------------------------------------------------------|
| Journal:                      | <i>BMJ Open</i>                                                                                                                                                                                                                                                                                                                                                                                                                                                                                                                                                                                                                                                                         |
| Manuscript ID                 | bmjopen-2018-026507                                                                                                                                                                                                                                                                                                                                                                                                                                                                                                                                                                                                                                                                     |
| Article Type:                 | Research                                                                                                                                                                                                                                                                                                                                                                                                                                                                                                                                                                                                                                                                                |
| Date Submitted by the Author: | 05-Sep-2018                                                                                                                                                                                                                                                                                                                                                                                                                                                                                                                                                                                                                                                                             |
| Complete List of Authors:     | Fogg, Alexandra; The Australian National University, Australian National University Medical School<br>Welsh, Jennifer; The Australian National University, National Centre for Epidemiology and Population Health (NCEPH)<br>Banks, Emily; The Australian National University, National Centre for Epidemiology and Population Health, Research School of Population Health; The Sax Institute<br>Abhayaratna, Walter; Canberra Hospital, Division of Medicine; The Australian National University, College of Health and Medicine<br>Korda, Rosemary; The Australian National University, National Centre for Epidemiology and Population Health, Research School of Population Health |
| Keywords:                     | Coronary heart disease < CARDIOLOGY, Coronary intervention < CARDIOLOGY, Cardiac Epidemiology < CARDIOLOGY                                                                                                                                                                                                                                                                                                                                                                                                                                                                                                                                                                              |
|                               |                                                                                                                                                                                                                                                                                                                                                                                                                                                                                                                                                                                                                                                                                         |

SCHOLARONE™  
Manuscripts

Only

**Title**

Variation in cardiovascular disease care: An Australian cohort study on gender inequalities in receipt of coronary procedures

**Authors**

Alexandra J. Fogg<sup>1</sup>, Jennifer Welsh<sup>2</sup>, Emily Banks<sup>2,3</sup>, Walter P. Abhayaratna<sup>4</sup> & Rosemary J. Korda<sup>2</sup>.

**Affiliations**

1. Australian National University Medical School, Australian National University, Canberra, Australia
2. National Centre for Epidemiology and Population Health, Research School of Population Health, Australian National University, Canberra, Australia
3. The Sax Institute, Sydney, Australia
4. College of Health and Medicine, Australian National University, Canberra, Australia

**Corresponding Author:**

Rosemary J. Korda

Mailing address: 62 Mills Road, Acton, ACT, Australia 2601

Ph: +61 2 6125 5583

[rosemary.korda@anu.edu.au](mailto:rosemary.korda@anu.edu.au)

Word Count: 2,910

**ABSTRACT**

**Objectives:** To quantify gender variation in diagnostic and revascularisation coronary procedures within one year of hospitalisation for acute myocardial infarction (AMI) or angina.

**Design:** Prospective cohort study. Baseline questionnaire (January 2006-April 2009) data from the Sax Institute's 45 and Up Study were linked to hospitalisation and mortality data (to 30 June 2016).

**Setting:** New South Wales, Australia.

**Participants:** Participants aged  $\geq 45$  years with no history of IHD who were admitted to hospital with a primary diagnosis of AMI (n=4,580), or a primary diagnosis of angina or chronic IHD with secondary diagnosis of angina (n=4,457).

**Outcome Measures:** Coronary angiography and coronary revascularisation with percutaneous coronary intervention or coronary artery bypass graft (PCI/CABG) within one year of index admission. Cox regression models compared male and female coronary procedure rates, adjusting sequentially for age, sociodemographic variables and health characteristics.

**Results:** Among patients admitted with AMI, 71.6% of men (crude rate: 3.45/person-year) and 64.7% of women (2.62/person-year) received angiography; 57.8% of men (1.73/person year) and 37.4% of women (0.77/person-year) received PCI/CABG. Fully adjusted hazard ratios (HRs) for men versus women were 1.00(0.92-1.08) for angiography and 1.51(1.38-1.67) for PCI/CABG; corresponding HRs among patients with angina were 1.27(1.17-1.37) and 2.46(2.19-2.77). In the angina group, rates were: angiography: males=2.43/person-year, females=1.34/person-year; PCI/CABG: males=0.94/person-year, females=0.28/person-year.

**Conclusions:** Men are more likely than women to receive coronary procedures, particularly revascularisation. This difference is most evident among people with angina, where care is more discretionary compared to AMI.

**Keywords:** Cardiovascular disease, Coronary procedure, Linked data, 45 and Up Study, Health inequality

**ARTICLE SUMMARY****Strengths and limitations of this study**

- This study uses population-based survey data linked to routinely collected health data.
- This study has a relatively large number of participants, with virtually complete capture of procedures.
- This study has adjusted for a large range of baseline sociodemographic and health factors, however clinical factors upon presentation to hospital were not included.
- While diagnosis of AMI is highly valid within hospital data, there is relatively low concordance for angina diagnoses, with possible over- or underrepresentation of rates.
- The Study cohort, while broadly representative of the general population, is likely to be healthier and have lower hospitalisation and mortality rates than their peers.

## BACKGROUND

Cardiovascular disease (CVD) is the leading cause of morbidity and mortality worldwide,[1] and a leading cause of death in Australia.[2] While incidence of CVD is higher among men,[3] in many parts of the world women experience worse outcomes.[4] Coronary interventions, including percutaneous coronary intervention (PCI) and coronary artery bypass grafting (CABG), contribute to improved outcomes following an acute coronary event in both men and women.[4] Despite the significant disease burden and availability of effective interventions, CVD in women as a whole remains underdiagnosed and less aggressively treated.[5, 6] Women are underrepresented in clinical trials,[6] and there are important gaps in the evidence for recognition and treatment of adverse coronary events.

It is known that incident acute myocardial infarction (AMI) and angina pectoris present on average 7-10 years later in women compared to men.[6, 7] Women generally present to hospital older and with a greater number of risk factors than men,[6] experiencing higher mortality and re-infarction rates following a first AMI.[7] Disparities in care received by women compared to men have been documented in the United States (US), even when accounting for income, education and site of care.[8] Evidence from Europe and the US demonstrate that women with CVD are less likely to undergo diagnostic angiograms or intervention with PCI or CABG,[6, 7] procedures with documented clinical benefit.[4, 5]

There is limited information on gender inequalities in cardiovascular care in Australia, including diagnosis and management with coronary procedures. Age-standardised rates of procedures are lower among women compared to men,[9] however underlying CVD and other factors related to delivery of care are not taken into consideration in these figures. Hence, the extent to which these differences in rates reflect inequalities in care is uncertain. This study aimed to quantify gender inequalities in care delivery by comparing coronary procedure rates in men and women admitted with AMI or angina, adjusting for other sociodemographic and health-related factors.

## METHODS

### Data sources

Data were obtained from the Sax Institute's 45 and Up Study, a population-based cohort study involving 267,153 men and women aged 45 and over from New South Wales (NSW) Australia. 45 and Up Study participants were randomly selected from the Department of Human Services (formerly Medicare Australia) database, Australia's universal health insurance system, with oversampling of individuals living in rural areas and those over the age of 80 by a factor of 2. All individuals living in remote areas were invited to participate. Participants enrolled by completing a mailed self-administered questionnaire and provided signed consent for long-term follow-up and data-linkage with a range of health databases. Approximately 10% of the NSW population aged 45 and over were included in the sample, an overall response rate of 18%. The Study is described in detail elsewhere,[10] with questionnaires available online.[11]

Baseline data from 45 and Up Study participants were linked to hospital data from the NSW Admitted Patient Data Collection (APDC, 1 July 2000 to 30 June 2016) and death data from the NSW Registry of Births, Deaths and Marriages and the National Death Index (1 January 2006 to 30 June 2016). The latter was linked by the Australian Institute of Health and Welfare. Included in the APDC is a record of all hospitalisations in NSW, dates of admission and discharge, and reason for admission. International Statistical Classification of Diseases and Related Health Problems, Tenth Revision, Australian Modification (ICD-10-AM) and Australian Classification of Health Interventions codes are incorporated into the APDC, with each record containing up to 51 diagnosis and 50 procedure codes. Death data included date of death (used for censoring).

Data were linked probabilistically by the Centre for Health Record linkage using personal information (full name, date of birth, gender, and address). It is likely that during the follow-up period a small but unknown number of participants may have moved interstate. Though hospitalisations in neighbouring states are not included, these are estimated to make up fewer than 2% of admissions in NSW residents. Follow-up for hospitalisations is considered to be ~98% complete among those who continue to live in NSW. Quality assurance data on the data linkage show false positive and negative rates of <0.5% and <0.1% respectively.

## Study Population

All 45 and Up Study participants admitted to hospital with a primary diagnosis of AMI or angina (stable or unstable) following entry into the 45 and Up Study were included in the sample. Those with a primary diagnosis of chronic ischaemic heart disease (IHD) and secondary diagnosis of angina were also included, due to the possibility of angina patients being admitted for elective revascularisation under these diagnostic codes. ICD-10-AM diagnosis codes (I21, I20, and I25 respectively) were used to ascertain admission. Participants with a prior history of IHD were excluded, defined as self-reported heart disease on the baseline questionnaire and/or admission to hospital for IHD (120-125), and/or a related interventional procedure (angiogram, PCI or CABG – defined below), as ascertained by diagnosis and procedure code fields of APDC in the six years prior to entering the 45 and Up Study.

## Variables

The study outcomes were investigation with angiography, and coronary intervention with PCI or CABG, within 12 months of index admission to hospital.

Outcomes were ascertained using all 50 APDC procedure-code fields, coded using the Australian Classification of Health Interventions which is used in conjunction with ICD-10-AM,[12]: angiography (38215, 38218), PCI (35304-00, 35305-00, 35304-01, 35305-01, *38300-00*, *38303-00* (block: 670), 35310-00, 35310-01, 35310-02, 35310-03, 35310-05, *38306-00*, *38306-01*, *38306-02*, *38306-03*, *38306-05* (block: 671)) and CABG (38497-00 to 38497-07, 38500-00 to 38500-04, 38503-00 to 38503-04, 90201-00 to 90201-03, *38500-05*, *38503-05* (blocks 672-679)). Italicised codes have been included to reflect changes in procedure coding during the follow-up period.

The main exposure of interest was gender (male or female), self-reported on the baseline questionnaire. Sociodemographic and health characteristics that may confound/mediate the relationship between gender and receipt of coronary procedures were also measured on the baseline questionnaire. These included: country of birth (Australia/New Zealand or other), region of residence (major city, inner regional, or outer regional/remote/very remote), highest qualification (no school certificate, school/trade certificate or diploma, or tertiary degree), private health insurance (no private



1  
2  
3 health insurance, or health care/Department of Veterans Affairs concession card), marital status  
4 (married/de facto, or not), obesity (body mass index (BMI) $\geq 30\text{kg/m}^2$ , or not, based on self-reported  
5 height and weight), physical functioning (no/minor limitations, moderate limitations, or severe  
6 limitations, based on levels of functional limitation, as adapted from the Medical Outcomes Score  
7 Physical Functioning Subscale [13]), and psychological distress (low[10-<16], moderate[16-<22], or  
8 high[22-50], as per the Kessler 10).[14]  
9  
10  
11  
12  
13  
14  
15

## 16 **Analysis**

17  
18 Cox proportional hazard regression was used to model the association between gender and receipt of  
19 coronary procedures. For each analysis, participants contributed person-years from the date of index  
20 admission for AMI or angina until either the specified outcome of interest, death from any cause, or  
21 end of follow up 30 June 2016, whichever was the earliest, to a maximum of one calendar year.  
22 Proportional hazards assumption was tested, with the p-value set *a priori* to  $p < 0.01$ . All analyses were  
23 conducted separately for patients whose index admission was for AMI, and for those whose index  
24 admission was for angina. Patients presenting concurrently with AMI and angina were included in the  
25 AMI sample.  
26  
27  
28  
29  
30  
31  
32  
33

34 For each outcome, we calculated crude incidence rates separately for men and women, then  
35 ran a series of Cox regression models to estimate hazard ratios (HRs) in relation to gender. Model 1  
36 was adjusted for age (5-year age categories from 45-54years through to  $\geq 85$ years). Model 2 was  
37 adjusted for age and sociodemographic variables (country of birth, region of residence, highest  
38 qualification, private health insurance and marital status). Model 3 was further adjusted for additional  
39 baseline health characteristics (obesity, physical functioning and psychological distress). Participants  
40 with missing values for covariates were included in the models, with missing coded as a separate  
41 category.  
42  
43  
44  
45  
46  
47  
48  
49

50 Four sensitivity analyses were performed. First, we used a maximum follow-up period of 30  
51 days after index admission rather than 12 months. Second, we used an alternative indicator of baseline  
52 health – self-rated health, measured with three categories (excellent/very good, good, fair/poor) –  
53 instead of functional limitation, obesity and psychological distress (Model 3). Third, we additionally  
54  
55  
56  
57

1  
2  
3 controlled for comorbidity using the Charlson index,[15] using all diagnostic codes in the 12 months  
4 prior to the index admission, with scores categorised as 0, 1 or  $\geq 2$ . Fourth, we restricted analysis of  
5 the angina patients to those admitted with a primary diagnosis of unstable angina (ICD-10: I20.0).  
6  
7

8  
9 Analyses were performed using Stata 14.[16]

10  
11 The conduct of the 45 and Up Study was approved by the University of New South Wales  
12 Human Research Ethics Committee. Ethics approval for this study was obtained from the Australian  
13 National University Human Ethics Committee (2015/513) and the NSW Population and Health  
14 Services Research Ethics Committee (HREC/10/CIPHS/33; CI NSW Study Reference 2010/05/234).  
15  
16  
17  
18  
19

## 20 21 **RESULTS**

22  
23 A total of 9,037 patients were included in the study, 4,580 admitted with AMI and 4,457 admitted  
24 with angina. There were no patients in the sample who had IHD as a primary diagnosis and angina as  
25 a secondary diagnosis. Sample characteristics are shown in Table 1. The profiles of patients within the  
26 AMI and angina groups were similar, with a few exceptions. Notably, those in the angina group were  
27 less likely to be aged 85 and over (8.56% vs 19.4%), and more likely to have private health insurance  
28 at baseline (64.6% vs 56.9%) than those in the AMI group. There was a greater percentage of men  
29 within both AMI and angina groups, 63.6% and 56.2% respectively.  
30  
31  
32  
33  
34  
35  
36  
37  
38  
39  
40  
41  
42  
43  
44  
45  
46  
47  
48  
49  
50  
51  
52  
53  
54  
55  
56  
57  
58  
59  
60

**Table 1:** Characteristics of patients admitted to hospital with acute myocardial infarction (AMI) or angina by gender

|                                      | AMI Sample (n=4,580) |      |       |      | Angina Sample (n=4,457) |      |       |      |
|--------------------------------------|----------------------|------|-------|------|-------------------------|------|-------|------|
|                                      | Men                  |      | Women |      | Men                     |      | Women |      |
|                                      | n                    | %    | n     | %    | n                       | %    | n     | %    |
| <b>Total</b>                         | 2911                 | 63.6 | 1669  | 36.4 | 2503                    | 56.2 | 1954  | 43.8 |
| <b>Age at admission</b>              |                      |      |       |      |                         |      |       |      |
| 45-54                                | 190                  | 6.5  | 80    | 4.8  | 152                     | 6.1  | 151   | 7.7  |
| 55-64                                | 685                  | 23.5 | 277   | 16.6 | 628                     | 25.1 | 499   | 25.5 |
| 65-74                                | 807                  | 27.7 | 414   | 24.8 | 897                     | 35.8 | 622   | 31.8 |
| 75-84                                | 757                  | 26.0 | 481   | 28.8 | 634                     | 25.3 | 493   | 25.2 |
| 85+                                  | 472                  | 16.2 | 417   | 25.0 | 192                     | 7.7  | 189   | 9.7  |
| <b>Region of residence</b>           |                      |      |       |      |                         |      |       |      |
| Major city                           | 1485                 | 51.0 | 807   | 48.4 | 1321                    | 52.8 | 972   | 49.7 |
| Inner regional                       | 1025                 | 35.2 | 629   | 37.7 | 886                     | 35.4 | 717   | 36.7 |
| Regional/remote                      | 354                  | 12.2 | 200   | 12.0 | 259                     | 10.4 | 237   | 12.1 |
| <b>Highest qualification</b>         |                      |      |       |      |                         |      |       |      |
| No school certificate                | 417                  | 14.3 | 357   | 21.4 | 305                     | 12.2 | 326   | 16.7 |
| School/ certificate/ diploma         | 1923                 | 66.1 | 1085  | 65.0 | 1629                    | 65.1 | 1310  | 67.0 |
| Tertiary degree                      | 497                  | 17.1 | 175   | 10.5 | 502                     | 20.1 | 276   | 14.1 |
| <b>Country of birth</b>              |                      |      |       |      |                         |      |       |      |
| Australia/ NZ                        | 2142                 | 73.6 | 1323  | 79.3 | 1888                    | 75.4 | 1576  | 80.7 |
| Other                                | 728                  | 25.0 | 327   | 19.6 | 583                     | 23.3 | 353   | 18.1 |
| <b>Marital status</b>                |                      |      |       |      |                         |      |       |      |
| Single                               | 647                  | 22.2 | 750   | 44.9 | 465                     | 18.6 | 638   | 32.7 |
| Married/ de facto                    | 2244                 | 77.1 | 916   | 54.9 | 2011                    | 80.3 | 1313  | 67.2 |
| <b>BMI</b>                           |                      |      |       |      |                         |      |       |      |
| Not obese (BMI<30kg/m <sup>2</sup> ) | 2079                 | 71.4 | 1100  | 65.9 | 1713                    | 68.4 | 1260  | 64.5 |
| Obese (BMI≥30kg/m <sup>2</sup> )     | 625                  | 21.5 | 394   | 23.6 | 619                     | 24.7 | 479   | 24.5 |
| <b>Physical functioning</b>          |                      |      |       |      |                         |      |       |      |
| No or minor limitation               | 1412                 | 48.5 | 469   | 28.1 | 1221                    | 48.8 | 691   | 35.4 |
| Moderate limitations                 | 646                  | 22.2 | 386   | 23.1 | 647                     | 25.9 | 517   | 26.5 |
| Severe limitations                   | 393                  | 13.5 | 392   | 23.5 | 301                     | 12.0 | 373   | 19.1 |
| <b>Psychological distress</b>        |                      |      |       |      |                         |      |       |      |
| Low                                  | 1958                 | 67.3 | 948   | 56.8 | 1,681                   | 67.2 | 1,131 | 57.9 |
| Moderate                             | 339                  | 11.7 | 205   | 12.3 | 337                     | 13.5 | 273   | 14.0 |
| High                                 | 188                  | 6.5  | 111   | 6.7  | 178                     | 7.1  | 172   | 8.8  |
| <b>Health Insurance</b>              |                      |      |       |      |                         |      |       |      |
| No private health insurance          | 1164                 | 40.0 | 807   | 48.4 | 845                     | 33.8 | 731   | 37.4 |
| Health care/DVA                      | 1746                 | 60.0 | 862   | 51.7 | 1658                    | 66.2 | 1223  | 62.6 |

% of missing cases: AMI sample (men, women): region of residence (1.6, 2.0); highest qualification (2.5, 3.1); country of birth (1.4, 1.1); marital status (0.7, 0.2); BMI (7.1, 10.5); physical limitations (15.8, 25.3); psychological distress (14.6, 24.3); health insurance (<0.1, 0.0). Angina sample (men, women): region of residence (1.5, 1.4); highest qualification (2.7, 2.2); country of birth (1.3, 1.3); marital status (1.1, 0.1); BMI (6.8, 11.0); physical limitations (13.3, 19.1); psychological distress (12.3, 19.3); health insurance (0.0, 0.0).

### Coronary procedures in AMI patients

Among those admitted to hospital with AMI, 69.1% received angiography, 71.6% of men vs 64.7% of women, and 50.4% PCI/CABG, 57.8% vs 37.4% respectively. The proportion of AMI patients who survived the follow-up period and who had a procedure was 75.6% for angiography (77.6% v 71.9%), and 55.4% for PCI/CABG (63.2% vs 41.0%).

Crude rates per person-year of angiography were 3.45 (3.31-3.60) and 2.62 (2.47-2.78) in men and women respectively, and crude rates of PCI/CABG were 1.73 (1.64-1.81) and 0.77 (0.71-0.83) respectively (Table 2).

Cox models showed angiography rates were similar in men and women, with no difference after adjustment for sociodemographic and health variables (HR=1.00, 0.92-1.08) (Table 2). In contrast, rates for PCI/CABG were around 50% higher in men than women (adjusted HR=1.51, 1.38-1.67).

**Table 2:** Rates of coronary procedures within one year of admission with AMI by gender and associated hazard ratios (n=4,580)

|                    | Procedures/<br>pys | Crude rate per<br>py (95%CI) | Model 1<br>HR (95%CI) | Model 2<br>HR (95%CI) | Model 3<br>HR (95%CI) |
|--------------------|--------------------|------------------------------|-----------------------|-----------------------|-----------------------|
| <b>Angiography</b> |                    |                              |                       |                       |                       |
| Men                | 2085/604.1         | 3.45 (3.31-3.60)             | 1.08 (1.01-1.17)      | 1.02 (0.95-1.10)      | 1.00 (0.92-1.08)      |
| Women              | 1079/411.7         | 2.62 (2.47-2.78)             | 1.00                  | 1.00                  | 1.00                  |
| <b>PCI/CABG</b>    |                    |                              |                       |                       |                       |
| Men                | 1682/975.0         | 1.73 (1.64-1.81)             | 1.62 (1.48-1.78)      | 1.56 (1.42-1.71)      | 1.51 (1.38-1.67)      |
| Women              | 624/814.3          | 0.77 (0.71-0.83)             | 1.00                  | 1.00                  | 1.00                  |

Notes: py: person-year. Model 1 is adjusted for age at first admission. Model 2 is adjusted for age and sociodemographic variables (country of birth, region of residence, highest qualification, health insurance, marital status). Model 3 is adjusted for age, sociodemographic variables and health-related variables (obesity, physical functioning, psychological distress).

### Coronary procedures in angina patients

Among those admitted to hospital with angina, 64.2% received angiography, 70.2% of men vs 56.4% of women, and 35.9% PCI/CABG, 47.7% vs 20.9% respectively. The proportion of angina patients who survived to the end of the follow-up period and who had a procedure was 64.6% for angiography (70.9% vs 56.6%), and 36.1% for PCI/CABG (48.2% vs 20.7%).

Crude rates for angiography were 2.43 (2.32-2.55) and 1.34 (1.27-1.42) for men and women respectively, and crude rates for PCI/CABG were 0.94 (0.89-1.00) and 0.28 (0.25-0.31) respectively (Table 3).

Cox models showed angiography rates were around 30% higher among men after adjusting for all factors (HR=1.27, 1.17-1.37). Rates for PCI/CABG in men were around 150% times those of women (adjusted HR=2.46, 2.19-2.77).

**Table 3:** Rates of coronary procedures within one year of admission with angina by gender and associated hazard ratios (n=4,457)

|                    | Procedures/<br>pys | Crude rate per<br>py (95%CI) | Model 1<br>HR (95%CI) | Model 2<br>HR (95%CI) | Model 3<br>HR (95%CI) |
|--------------------|--------------------|------------------------------|-----------------------|-----------------------|-----------------------|
| <b>Angiography</b> |                    |                              |                       |                       |                       |
| Men                | 1758/723.6         | 2.43 (2.32-2.55)             | 1.33 (1.24-1.44)      | 1.29 (1.19-1.39)      | 1.27 (1.17-1.37)      |
| Women              | 1101/820.1         | 1.34 (1.27-1.42)             | 1.00                  | 1.00                  | 1.00                  |
| <b>PCI/CABG</b>    |                    |                              |                       |                       |                       |
| Men                | 1193/1262.6        | 0.94 (0.89-1.00)             | 2.58 (2.31-2.89)      | 2.51 (2.24-2.82)      | 2.46 (2.19-2.77)      |
| Women              | 408/1471.1         | 0.28 (0.25-0.31)             | 1.00                  | 1.00                  | 1.00                  |

Notes: py: person-year. Model 1 is adjusted for age at first admission. Model 2 is adjusted for age and sociodemographic variables (country of birth, region of residence, highest qualification, health insurance, marital status). Model 3 is adjusted for age, sociodemographic variables and health-related variables (obesity, physical functioning, psychological distress).

There were no violations of the proportional hazards assumption for the gender variable in the models with 12 months of follow-up.

Sensitivity analyses using a 30-day follow-up period produced almost identical HRs (Supplementary Tables S1-S2). While violations of the proportional hazards assumption were found on testing in both the AMI and angina samples, there were no major violations detected in log-log plots. Hazard ratios were not materially different to those in the main analysis when adjusted for self-rated health as an alternative indicator of health (Tables S3-S4), when additionally adjusted for the Charlson index (Tables S5-S6), or when estimated on a sample restricted to patients admitted with a primary diagnosis of unstable angina (Table S7).

## DISCUSSION

Our findings demonstrate clear gender differences in receipt of coronary procedures. Men were more likely to receive coronary revascularisation (PCI/CABG) for the management of AMI or angina. Differences in revascularisation rates were most pronounced among those admitted with angina, among whom men were also more likely to undergo diagnostic angiography.

This study uses Australian data, with findings generally consistent with published evidence internationally. There is evidence from the US and Sweden that men are more likely than women to receive revascularisation procedures such as PCI or CABG following hospital admission with AMI or angina.[7, 17] Our finding that rates of PCI/CABG among men were 1.5 and 2.5 times those for women for AMI and angina respectively, is consistent with the above studies. A cohort study from the United Kingdom demonstrated this relationship for CABG, with men having twice the odds of receiving CABG than women (OR=1.90,1.21-3.00), however no difference in overall revascularisation rates was found (p=0.14).[18] Evidence regarding angiography is less consistent. There is evidence from the US, including a review, that suggests gender differences exist,[19, 20] however these considered acute coronary syndrome as a whole, rather than AMI and angina separately. No significant difference was found in the United Kingdom for receipt of CVD investigations, including angiography.[18] This is consistent with our findings on angiography in AMI patients, but differ from our findings in angina patients where we found a 30% difference in rates between men and women.

Factors driving the observed gender differences in procedure rates are not known, however likely contributors include differences in clinical presentation. There are established gender differences in the pathophysiology, diagnosis and outcome of therapies related to AMI and angina.[7] For example, greater proportions of small vessel coronary disease among women, including Takotsubo cardiomyopathy and other forms of myocardial infarction with non-obstructive coronary arteries,[21] could contribute to lower rates of PCI/CABG following AMI. Following CABG, women experience higher complication rates and increased mortality compared to men, a finding that is more pronounced in younger age groups.[6] While this may contribute to the lower rate of procedures

1  
2  
3 among women, the directionality of this relationship cannot be assumed. While we did adjust for  
4 physical functioning and comorbidity, clinical factors including symptom severity were not accounted  
5 for in our models. A US review, however, concluded that clinical factors do not fully explain the  
6 discrepancies in procedure rates between genders.[22] Thus, while we cannot exclude the possibility  
7 of the gender differences representing appropriate clinical care, this seems an unlikely explanation for  
8 the total observed variation in procedure rates, with multiple factors likely at play.[22]  
9  
10  
11  
12  
13

14 Another possible explanation for our findings is unwarranted variation due to gender  
15 discrimination. This includes the possibility of unconscious gender bias, with one systematic review  
16 demonstrating implicit bias towards patients by healthcare professionals.[23] Australia's universal  
17 health system, providing free access to hospital care, should present few barriers to receiving  
18 equitable care. There are clear guidelines for the use of coronary procedures among patients  
19 presenting with AMI, however the use of procedures for those presenting with angina is more  
20 discretionary.[24] Gender differences found in receipt of coronary procedures, particularly for the  
21 more discretionary cases of angina, reinforce the suggestion that these differences reflect an inequality  
22 in care. This raises two distinct issues. First, the possible underuse of coronary procedures in women,  
23 which may indicate that the health care needs of a portion of Australians are not being adequately  
24 met, and second, the possible overuse of coronary procedures in men, which raises the question of  
25 waste within a health care system with limited resources.[24]  
26  
27  
28  
29  
30  
31  
32  
33  
34  
35  
36  
37

38 Strengths of this study include the use of population-based survey data linked to routinely  
39 collected data. The number of participants included was relatively large, with virtually complete  
40 capture of procedures. Questionnaire and other data permitting, there was adjustment for a large range  
41 of baseline sociodemographic and health factors (most of which are not included in administrative  
42 data). Additionally, the diagnosis of AMI is highly valid within hospital data, with high concordance  
43 between diagnostic codes and physician review.[25] This is not true for angina however, where  
44 concordance is relatively low.[25] This may have led to an over- or underestimation of procedure  
45 rates for angina. As only those admitted to hospital were included in this study, it is possible that  
46 some participants with angina, who could benefit from a coronary procedure, were not captured.  
47  
48  
49  
50  
51  
52  
53  
54  
55  
56 While the 45 and Up Study cohort is broadly representative of the general population, participants are  
57  
58  
59  
60

1  
2  
3 likely to be healthier and have lower hospitalisation and mortality rates than others in this age group,  
4 consistent with the healthy cohort effect.[26] However, while this may mean that the absolute rates of  
5 coronary procedures among those with coronary heart disease in this study differ from those of the  
6 general population, internal comparisons are unlikely to be influenced by this bias, hence relative  
7 rates in relation to gender are likely to remain valid.[27, 28]  
8  
9  
10  
11  
12

## 13 14 15 **CONCLUSION**

16  
17 Cardiovascular disease is a national health priority for Australia, with substantial morbidity and  
18 mortality. This study showed that men are more likely than women to receive coronary  
19 revascularisation procedures following admission to hospital with an AMI or angina. This relationship  
20 was particularly evident among the angina group, for whom care is more discretionary. While we  
21 cannot exclude that this discrepancy reflects appropriate care due to differences in clinical  
22 presentation, this is unlikely to fully explain the observed findings. Rather, clear gender differences,  
23 accounting for sociodemographic position and health-related factors, may indicate that the health care  
24 needs of a portion of the Australian population are not being adequately met. Morbidity and mortality  
25 among Australian women may be unnecessarily increased due to not receiving coronary intervention  
26 following AMI or angina. Alternatively, relative over-use in men cannot be ruled out. Either way,  
27 there is potential for health gain in elucidating and addressing this gender inequality in receipt of  
28 coronary intervention, increasing awareness and delivery of best practice care.  
29  
30  
31  
32  
33  
34  
35  
36  
37  
38  
39  
40  
41  
42

## 43 **Abbreviations**

44  
45 CVD: Cardiovascular Disease; AMI: Acute Myocardial Infarction; NSW: New South Wales; APDC:  
46 NSW Admitted Patients Data Collection; ICD-10-AM: International statistical Classification of  
47 Diseases and related health problems, tenth revision, Australian Modification; PCI: Percutaneous  
48 Coronary Intervention; CABG: Coronary Artery Bypass Grafting; IHD: Ischaemic Heart Disease;  
49 HR: Hazard Ratio; CI: Confidence Interval; BMI: Body Mass Index; PY: person years.  
50  
51  
52  
53  
54  
55  
56  
57  
58  
59  
60



## DECLARATIONS

### **Ethics approval**

Ethics approvals for this project were obtained from the NSW Population and Health Services Research Ethics Committee, the University of NSW Human Research Ethics Committee and the Australian National University Human Research Ethics Committee. Participants in the 45 and Up Study provided signed consent for linkage of their information to a range of health-related databases.

### **Patient and Public Involvement**

Not applicable. Patients were not involved in the development of this study.

### **Availability of data and material**

The datasets used during the current study are available upon application to the Sax Institute ([www.saxinstitute.org.au/our-work/45-up-study](http://www.saxinstitute.org.au/our-work/45-up-study)). To do so, one must have a scientifically sound and feasible research proposal, ethics approval for the proposal, data custodian approval for access to linked data, and be able to meet 45 and Up Study license and SURE user charges.

### **Competing interests**

The authors declare that they have no competing interests.

### **Funding**

This research was supported by a NSW CVRN Women and Heart Disease grant from the National Heart Foundation of Australia (101692). EB is supported by the National Health and Medical Research Council of Australia (1042717).

### **Author's contributions**

AF provided input into the study design, performed statistical analysis, interpreted the data and drafted the manuscript. JW provided input into the study design, performed statistical analysis and reviewed the manuscript. EB provided input into the study design and reviewed the manuscript. WA

1  
2  
3 reviewed the manuscript. RK conceived and designed the study and assisted in writing the  
4  
5 manuscript. All authors read and approved the final manuscript.  
6  
7

### 8 9 **Acknowledgements**

10 This research was completed using data collected through the 45 and Up Study  
11  
12 (www.saxinstitute.org.au). The 45 and Up Study is managed by the Sax Institute in collaboration with  
13  
14 major partner Cancer Council NSW; and partners: the National Heart Foundation of Australia (NSW  
15  
16 Division); NSW Ministry of Health; NSW Government Family & Community Services – Ageing,  
17  
18 Carers and the Disability Council NSW; and the Australian Red Cross Blood Service. We thank the  
19  
20 many thousands of people participating in the 45 and Up Study. We also acknowledge the assistance  
21  
22 of the Centre for Health Record Linkage.  
23  
24  
25  
26

### 27 **REFERENCES**

- 28  
29  
30  
31 1 GBD 2013 Mortality and Causes of Death Collaborators. Global, regional, and national age–  
32  
33 sex specific all-cause and cause-specific mortality for 240 causes of death, 1990–2013: a  
34  
35 systematic analysis for the Global Burden of Disease Study 2013. *Lancet* 2015;385:117-71 doi:  
36  
37 10.1016/S0140-6736(14)61682-2.  
38  
39 2 Australian Bureau of Statistics. Causes of Death, Australia, 2016. In: Australian Bureau of  
40  
41 Statistics, ed: Cat no. 3303.0. Canberra: ABS 2017.  
42  
43 3 Australian Institute for Health and Welfare. Cardiovascular disease: Australian facts 2011. In:  
44  
45 Cardiovascular disease series. Cat. no. CVD 53, ed. Canberra: AIHW 2011.  
46  
47 4 Pagidipati NJ, Peterson ED. Acute coronary syndromes in women and men. *Nat Rev Cardiol*  
48  
49 2016;13:471 10.1038/nrcardio.2016.89.  
50  
51 5 Mehta LS, Beckie TM, DeVon HA, *et al.* Acute Myocardial Infarction in Women: A Scientific  
52  
53 Statement From the American Heart Association *Circulation* 2016;133:00-  
54  
55 10.1161/CIR.0000000000000351.  
56  
57  
58  
59  
60

- 1  
2  
3 6 Maas A, Appelman Y. Gender differences in coronary heart disease. *Neth Heart J*  
4 2010;18:598-603 10.1007/s12471-010-0841-y.  
5  
6  
7 7 Bogaev RC. Gender Disparities Across the Spectrum of Advanced Cardiac Therapies: Real or  
8 Imagined? *Curr Cardiol Rep* 2016;18:108 10.1007/s11886-016-0783-0.  
9  
10  
11 8 Graham G. Acute Coronary Syndromes in Women: Recent Treatment Trends and Outcomes.  
12 *Clin Med Insights Cardiol* 2016;10:CMC.S37145 10.4137/CMC.S37145.  
13  
14  
15 9 Australian Institute of Health and Welfare. Women and heart disease: cardiovascular profile of  
16 women in Australia. *Cardiovascular disease series no 33 Cat no CVD 49*. Canberra: AIHW  
17 2010.  
18  
19  
20  
21 10 Banks E, Redman S, Jorm L, *et al*. Cohort profile: the 45 and up study. *Int J Epidemiol*  
22 2008;37:941-7 10.1093/ije/dym184.  
23  
24  
25 11 The Sax Institute. Questionnaires. 2008.  
26  
27 12 National Centre for Classification in Health. The Australian classification of health  
28 interventions (ACHI) 6th edition. Tabular list of interventions and alphabetic index of  
29 interventions. Sydney 2007.  
30  
31  
32  
33 13 Smith DP, Weber MF, Soga K, *et al*. Relationship between Lifestyle and Health Factors and  
34 Severe Lower Urinary Tract Symptoms (LUTS) in 106,435 Middle-Aged and Older Australian  
35 Men: Population-Based Study. *PLoS One* 2014;9:e109278 10.1371/journal.pone.0109278.  
36  
37  
38  
39 14 Kessler RC, Andrews G, Colpe LJ, *et al*. Short screening scales to monitor population  
40 prevalences and trends in non-specific psychological distress. *Psychol Med* 2002;32:959-76  
41  
42  
43 15 Quan H, Li B, Couris CM, *et al*. Updating and Validating the Charlson Comorbidity Index and  
44 Score for Risk Adjustment in Hospital Discharge Abstracts Using Data From 6 Countries. *Am J*  
45 *Epidemiol* 2011;173:676-82 10.1093/aje/kwq433.  
46  
47  
48  
49 16 StataCorp. Stata Statistical Software: Release 14. College Station, TX:StataCorp LP 2015.  
50  
51 17 Haglund B, Köster M, Nilsson T, *et al*. Inequality in access to coronary revascularization in  
52 Sweden. *Scand Cardiovasc J* 2004;38:334-9 10.1080/14017430410021516.  
53  
54  
55  
56  
57  
58  
59  
60

- 1  
2  
3 18 Raine RA, Black NA, Bowker TJ, *et al.* Gender differences in the management and outcome of  
4 patients with acute coronary artery disease. *J Epidemiol Community Health* 2002;56:791  
5  
6  
7 19 Redberg RF. Gender differences in acute coronary syndrome: invasive versus conservative  
8 approach. *Cardiol Rev* 2006;14:299-302 10.1097/01.crd.0000240901.89437.b8.  
9  
10  
11 20 Anand SS, Xie CC, Mehta S, *et al.* Differences in the Management and Prognosis of Women  
12 and Men Who Suffer From Acute Coronary Syndromes. *J Am Coll Cardiol* 2005;46:1845-51  
13 10.1016/j.jacc.2005.05.091.  
14  
15  
16  
17 21 Agewall S, Beltrame JF, Reynolds HR, *et al.* ESC working group position paper on myocardial  
18 infarction with non-obstructive coronary arteries. *Eur Heart J* 2017;38:143-53  
19 10.1093/eurheartj/ehw149.  
20  
21  
22  
23 22 Sheifer SE, Escarce JJ, Schulman KA. Race and sex differences in the management of coronary  
24 artery disease. *Am Heart J* 2000;139:848-57 [https://doi.org/10.1016/S0002-8703\(00\)90017-6](https://doi.org/10.1016/S0002-8703(00)90017-6).  
25  
26  
27 23 FitzGerald C, Hurst S. Implicit bias in healthcare professionals: a systematic review. *BMC Med*  
28 *Ethics* 2017;18:19 10.1186/s12910-017-0179-8.  
29  
30  
31 24 Korda RJ, Clements MS, Kelman CW. Universal health care no guarantee of equity:  
32 Comparison of socioeconomic inequalities in the receipt of coronary procedures in patients  
33 with acute myocardial infarction and angina. *BMC Public Health* 2009;9:460 10.1186/1471-  
34 2458-9-460.  
35  
36  
37  
38  
39 25 Heckbert SR, Kooperberg C, Safford MM, *et al.* Comparison of Self-Report, Hospital  
40 Discharge Codes, and Adjudication of Cardiovascular Events in the Women's Health Initiative.  
41 *Am J Epidemiol* 2004;160:1152-8 10.1093/aje/kwh314.  
42  
43  
44  
45 26 Lindsted KD, Fraser GE, Steinkohl M, *et al.* Healthy volunteer effect in a cohort study:  
46 Temporal resolution in the adventist health study. *J Clin Epidemiol* 1996;49:783-90  
47 10.1016/0895-4356(96)00009-1.  
48  
49  
50  
51 27 Mealing NM, Banks E, Jorm LR, *et al.* Investigation of relative risk estimates from studies of  
52 the same population with contrasting response rates and designs. *BMC Med Res Methodol*  
53 2010;10:26 10.1186/1471-2288-10-26.  
54  
55  
56  
57  
58  
59  
60

1  
2  
3  
4  
5  
6  
7  
8  
9  
10  
11  
12  
13  
14  
15  
16  
17  
18  
19  
20  
21  
22  
23  
24  
25  
26  
27  
28  
29  
30  
31  
32  
33  
34  
35  
36  
37  
38  
39  
40  
41  
42  
43  
44  
45  
46  
47  
48  
49  
50  
51  
52  
53  
54  
55  
56  
57  
58  
59  
60

28 Rothman KJ, Gallacher JEJ, Hatch EE. Why representativeness should be avoided. *Int J Epidemiol* 2013;42:1012-4 10.1093/ije/dys223.

For peer review only

## Supplementary Material

## Variation in cardiovascular disease care: A cohort study on gender inequalities in receipt of coronary procedures

**Table S1:** Rates of coronary procedures within 30 days of admission with AMI by gender and associated hazard ratios (n=4,580)

|                    | Procedures/<br>pys | Crude rate per py<br>(95%CI) | Model 1<br>HR (95%CI) | Model 2<br>HR (95%CI) | Model 3<br>HR (95%CI) |
|--------------------|--------------------|------------------------------|-----------------------|-----------------------|-----------------------|
| <b>Angiography</b> |                    |                              |                       |                       |                       |
| Men                | 2049/73.7          | 27.8 (26.6-29.0)             | 1.08 (1.00-1.16)      | 1.02 (0.95-1.10)      | 0.99 (0.92-1.07)      |
| Women              | 1060/48.9          | 21.7 (20.4-23.0)             | 1.00                  | 1.00                  | 1.00                  |
| <b>PCI/CABG</b>    |                    |                              |                       |                       |                       |
| Men                | 1624/108.9         | 14.9 (14.2-15.67)            | 1.60(1.46-1.76)*      | 1.54(1.40-1.69)*      | 1.49(1.36-1.65)*      |
| Women              | 600/83.8           | 7.15 (6.60-7.75)             | 1.00                  | 1.00                  | 1.00                  |

Notes: py: person-year. Model 1 is adjusted for age at admission (in 5-year age categories). Model 2 is adjusted for age and sociodemographic variables (country of birth, region of residence, highest qualification, health insurance, marital status) Model 3 is adjusted for age, sociodemographic variables and health-related variables (obesity, physical functioning and psychological distress). \* indicates that the proportional hazard assumption is violated.

**Table S2:** Rates of coronary procedures within 30 days of admission with angina by gender and associated hazard ratios (n=4,457)

|                    | Procedures<br>/pys | Crude rate per py<br>(95%CI) | Model 1<br>HR (95%CI) | Model 2<br>HR (95%CI) | Model 3<br>HR (95%CI) |
|--------------------|--------------------|------------------------------|-----------------------|-----------------------|-----------------------|
| <b>Angiography</b> |                    |                              |                       |                       |                       |
| Men                | 1685/74.9          | 22.5 (21.5-23.6)             | 1.32 (1.22-1.42)      | 1.27 (1.17-1.37)      | 1.25 (1.15-1.35)      |
| Women              | 1054/79.4          | 13.3 (12.5-14.1)             | 1.00                  | 1.00                  | 1.00                  |
| <b>PCI/CABG</b>    |                    |                              |                       |                       |                       |
| Men                | 1083/127.4         | 8.50 (8.01-9.02)             | 2.50(2.23-2.82)*      | 2.43(2.15-2.74)*      | 2.37(2.10-2.67)*      |
| Women              | 371/132.7          | 2.79 (2.52-3.09)             | 1.00                  | 1.00                  | 1.00                  |

Notes: py: person-year. Model 1 is adjusted for age at admission (in 5-year age categories). Model 2 is adjusted for age and sociodemographic variables (country of birth, region of residence, highest qualification, health insurance, marital status) Model 3 is adjusted for age, sociodemographic variables and health-related variables (obesity, physical functioning and psychological distress). \* indicates that the proportional hazard assumption is violated.

**Table S3:** Associated hazard ratios for coronary procedures within one year of admission with AMI by gender (n=4,580)

|                    | <b>Model 1<br/>HR (95% CI)</b> | <b>Model 2<br/>HR (95%CI)</b> | <b>Model 3<br/>HR (95%CI)</b> |
|--------------------|--------------------------------|-------------------------------|-------------------------------|
| <b>Angiography</b> |                                |                               |                               |
| Men                | 1.08 (1.01-1.17)               | 1.02 (0.95-1.10)              | 1.02 (0.94-1.10)              |
| Women              | 1.00                           | 1.00                          | 1.00                          |
| <b>PCI/CABG</b>    |                                |                               |                               |
| Men                | 1.62 (1.48-1.78)               | 1.56 (1.42-1.71)              | 1.55 (1.41-1.71)              |
| Women              | 1.00                           | 1.00                          | 1.00                          |

Notes: Model 1 is adjusted for age at admission (in 5-year age categories). Model 2 is adjusted for age and socio-variables (country of birth, region of residence, highest qualification, health insurance, marital status). Model 3 is adjusted for age, sociodemographic variables and health-related variables (self-rated health only).

**Table S4:** Associated hazard ratios for coronary procedures within one year of admission with angina by gender (n=4,457)

|                    | <b>Model 1<br/>HR (95% CI)</b> | <b>Model 2<br/>HR (95%CI)</b> | <b>Model 3<br/>HR (95%CI)</b> |
|--------------------|--------------------------------|-------------------------------|-------------------------------|
| <b>Angiography</b> |                                |                               |                               |
| Men                | 1.33 (1.24-1.44)               | 1.29 (1.19-1.39)              | 1.28 (1.19-1.39)              |
| Women              | 1.00                           | 1.00                          | 1.00                          |
| <b>PCI/CABG</b>    |                                |                               |                               |
| Men                | 2.58 (2.31-2.89)               | 2.51 (2.24-2.82)              | 2.52 (2.25-2.83)              |
| Women              | 1.00                           | 1.00                          | 1.00                          |

Notes: Model 1 is adjusted for age at admission (in 5-year age categories). Model 2 is adjusted for age and sociodemographic variables (country of birth, region of residence, highest qualification, health insurance, marital status). Model 3 is adjusted for age, sociodemographic variables and health-related variables (self-rated health only).

**Table S5:** Associated hazard ratios for coronary procedures within one year of admission with AMI by gender (n=4,580)

|                    | <b>Model 1<br/>HR (95%CI)</b> | <b>Model 2<br/>HR (95%CI)</b> | <b>Model 3<br/>HR (95%CI)</b> |
|--------------------|-------------------------------|-------------------------------|-------------------------------|
| <b>Angiography</b> |                               |                               |                               |
| Men                | 1.08 (1.01-1.17)              | 1.02 (0.95-1.10)              | 1.00 (0.92-1.08)              |
| Women              | 1.00                          | 1.00                          | 1.00                          |
| <b>PCI/CABG</b>    |                               |                               |                               |
| Men                | 1.62 (1.48-1.78)              | 1.56 (1.42-1.71)              | 1.53 (1.39-1.68)              |
| Women              | 1.00                          | 1.00                          | 1.00                          |

Notes: Model 1 is adjusted for age at admission (in 5-year age categories). Model 2 is adjusted for age and sociodemographic variables (country of birth, region of residence, highest qualification, health insurance, marital status). Model 3 is adjusted for age, sociodemographic variables and health-related variables (obesity, physical functioning, psychological distress and the Charlson index).

**Table S6:** Associated hazard ratios for coronary procedures within one year of admission with angina by gender (n=4,457)

|                    | <b>Model 1<br/>HR (95%CI)</b> | <b>Model 2<br/>HR (95%CI)</b> | <b>Model 3<br/>HR (95%CI)</b> |
|--------------------|-------------------------------|-------------------------------|-------------------------------|
| <b>Angiography</b> |                               |                               |                               |
| Men                | 1.33 (1.24-1.44)              | 1.29 (1.19-1.39)              | 1.27 (1.18-1.37)              |
| Women              | 1.00                          | 1.00                          | 1.00                          |
| <b>PCI/CABG</b>    |                               |                               |                               |
| Men                | 2.58 (2.31-2.89)              | 2.51 (2.24-2.82)              | 2.49 (2.21-2.79)              |
| Women              | 1.00                          | 1.00                          | 1.00                          |

Notes: Model 1 is adjusted for age at admission (in 5-year age categories). Model 2 is adjusted for age and sociodemographic variables (country of birth, region of residence, highest qualification, health insurance, marital status). Model 3 is adjusted for age, sociodemographic variables and health-related variables (obesity, physical functioning, psychological distress and the Charlson index).



**Table S7:** Rates for coronary procedures within one year of admission with unstable angina (I20.0) gender and associated hazard ratios (n=2,131)

|                    | <b>Procedures<br/>/pys</b> | <b>Crude rate per<br/>py (95%CI)</b> | <b>Model 1<br/>HR (95%CI)</b> | <b>Model 2<br/>HR (95%CI)</b> | <b>Model 3<br/>HR (95%CI)</b> |
|--------------------|----------------------------|--------------------------------------|-------------------------------|-------------------------------|-------------------------------|
| <b>Angiography</b> |                            |                                      |                               |                               |                               |
| Men                | 735/429.5                  | 1.71 (1.59-1.84)                     | 1.32 (1.18-1.48)              | 1.31 (1.17-1.47)              | 1.30 (1.15-1.46)              |
| Women              | 491/448.5                  | 1.09 (1.00-1.20)                     | 1.00                          | 1.00                          | 1.00                          |
| <b>PCI/CABG</b>    |                            |                                      |                               |                               |                               |
| Men                | 481/665.5                  | 0.72 (0.66-0.79)                     | 2.55 (2.14-3.04)              | 2.54 (2.13-3.03)              | 2.53 (2.11-3.02)              |
| Women              | 173/746.5                  | 0.23 (0.20-0.27)                     | 1.00                          | 1.00                          | 1.00                          |

Notes: py: person-year. Model 1 is adjusted for age at admission (in 5-year age categories). Model 2 is further adjusted for country of birth, region of residence, highest qualification, marital status and health insurance. Model 3 is further adjusted for obesity, physical functioning and psychological distress.

STROBE Statement—Checklist of items that should be included in reports of *cohort studies*

|                              | Item No | Recommendation                                                                                                                                                                                                                                                                                                                                                                                                |
|------------------------------|---------|---------------------------------------------------------------------------------------------------------------------------------------------------------------------------------------------------------------------------------------------------------------------------------------------------------------------------------------------------------------------------------------------------------------|
| <b>Title and abstract</b>    | 1       | (a) Indicate the study's design with a commonly used term in the title or the abstract<br>(b) Provide in the abstract an informative and balanced summary of what was done and what was found                                                                                                                                                                                                                 |
| <b>Introduction</b>          |         |                                                                                                                                                                                                                                                                                                                                                                                                               |
| Background/rationale         | 2       | Explain the scientific background and rationale for the investigation being reported                                                                                                                                                                                                                                                                                                                          |
| Objectives                   | 3       | State specific objectives, including any prespecified hypotheses                                                                                                                                                                                                                                                                                                                                              |
| <b>Methods</b>               |         |                                                                                                                                                                                                                                                                                                                                                                                                               |
| Study design                 | 4       | Present key elements of study design early in the paper                                                                                                                                                                                                                                                                                                                                                       |
| Setting                      | 5       | Describe the setting, locations, and relevant dates, including periods of recruitment, exposure, follow-up, and data collection                                                                                                                                                                                                                                                                               |
| Participants                 | 6       | (a) Give the eligibility criteria, and the sources and methods of selection of participants. Describe methods of follow-up<br>(b) For matched studies, give matching criteria and number of exposed and unexposed                                                                                                                                                                                             |
| Variables                    | 7       | Clearly define all outcomes, exposures, predictors, potential confounders, and effect modifiers. Give diagnostic criteria, if applicable                                                                                                                                                                                                                                                                      |
| Data sources/<br>measurement | 8*      | For each variable of interest, give sources of data and details of methods of assessment (measurement). Describe comparability of assessment methods if there is more than one group                                                                                                                                                                                                                          |
| Bias                         | 9       | Describe any efforts to address potential sources of bias                                                                                                                                                                                                                                                                                                                                                     |
| Study size                   | 10      | Explain how the study size was arrived at                                                                                                                                                                                                                                                                                                                                                                     |
| Quantitative variables       | 11      | Explain how quantitative variables were handled in the analyses. If applicable, describe which groupings were chosen and why                                                                                                                                                                                                                                                                                  |
| Statistical methods          | 12      | (a) Describe all statistical methods, including those used to control for confounding<br>(b) Describe any methods used to examine subgroups and interactions<br>(c) Explain how missing data were addressed<br>(d) If applicable, explain how loss to follow-up was addressed<br>(e) Describe any sensitivity analyses                                                                                        |
| <b>Results</b>               |         |                                                                                                                                                                                                                                                                                                                                                                                                               |
| Participants                 | 13*     | (a) Report numbers of individuals at each stage of study—eg numbers potentially eligible, examined for eligibility, confirmed eligible, included in the study, completing follow-up, and analysed<br>(b) Give reasons for non-participation at each stage<br>(c) Consider use of a flow diagram                                                                                                               |
| Descriptive data             | 14*     | (a) Give characteristics of study participants (eg demographic, clinical, social) and information on exposures and potential confounders<br>(b) Indicate number of participants with missing data for each variable of interest<br>(c) Summarise follow-up time (eg, average and total amount)                                                                                                                |
| Outcome data                 | 15*     | Report numbers of outcome events or summary measures over time                                                                                                                                                                                                                                                                                                                                                |
| Main results                 | 16      | (a) Give unadjusted estimates and, if applicable, confounder-adjusted estimates and their precision (eg, 95% confidence interval). Make clear which confounders were adjusted for and why they were included<br>(b) Report category boundaries when continuous variables were categorized<br>(c) If relevant, consider translating estimates of relative risk into absolute risk for a meaningful time period |

|    |                          |    |                                                                                        |
|----|--------------------------|----|----------------------------------------------------------------------------------------|
| 1  | Other analyses           | 17 | Report other analyses done—eg analyses of subgroups and interactions, and              |
| 2  |                          |    | sensitivity analyses                                                                   |
| 3  |                          |    |                                                                                        |
| 4  | <b>Discussion</b>        |    |                                                                                        |
| 5  | Key results              | 18 | Summarise key results with reference to study objectives                               |
| 6  | Limitations              | 19 | Discuss limitations of the study, taking into account sources of potential bias or     |
| 7  |                          |    | imprecision. Discuss both direction and magnitude of any potential bias                |
| 8  |                          |    |                                                                                        |
| 9  | Interpretation           | 20 | Give a cautious overall interpretation of results considering objectives, limitations, |
| 10 |                          |    | multiplicity of analyses, results from similar studies, and other relevant evidence    |
| 11 | Generalisability         | 21 | Discuss the generalisability (external validity) of the study results                  |
| 12 |                          |    |                                                                                        |
| 13 | <b>Other information</b> |    |                                                                                        |
| 14 | Funding                  | 22 | Give the source of funding and the role of the funders for the present study and, if   |
| 15 |                          |    | applicable, for the original study on which the present article is based               |
| 16 |                          |    |                                                                                        |

17  
18 \*Give information separately for exposed and unexposed groups.

19  
20  
21 **Note:** An Explanation and Elaboration article discusses each checklist item and gives methodological background and  
22 published examples of transparent reporting. The STROBE checklist is best used in conjunction with this article (freely  
23 available on the Web sites of PLoS Medicine at <http://www.plosmedicine.org/>, Annals of Internal Medicine at  
24 <http://www.annals.org/>, and Epidemiology at <http://www.epidem.com/>). Information on the STROBE Initiative is  
25 available at <http://www.strobe-statement.org>.

26  
27  
28  
29  
30  
31  
32  
33  
34  
35  
36  
37  
38  
39  
40  
41  
42  
43  
44  
45  
46  
47  
48  
49  
50  
51  
52  
53  
54  
55  
56  
57  
58  
59  
60

# BMJ Open

## Variation in cardiovascular disease care: An Australian cohort study on sex differences in receipt of coronary procedures.

|                                 |                                                                                                                                                                                                                                                                                                                                                                                                                                                                                                                                                                                                                                                                                         |
|---------------------------------|-----------------------------------------------------------------------------------------------------------------------------------------------------------------------------------------------------------------------------------------------------------------------------------------------------------------------------------------------------------------------------------------------------------------------------------------------------------------------------------------------------------------------------------------------------------------------------------------------------------------------------------------------------------------------------------------|
| Journal:                        | <i>BMJ Open</i>                                                                                                                                                                                                                                                                                                                                                                                                                                                                                                                                                                                                                                                                         |
| Manuscript ID                   | bmjopen-2018-026507.R1                                                                                                                                                                                                                                                                                                                                                                                                                                                                                                                                                                                                                                                                  |
| Article Type:                   | Research                                                                                                                                                                                                                                                                                                                                                                                                                                                                                                                                                                                                                                                                                |
| Date Submitted by the Author:   | 22-Dec-2018                                                                                                                                                                                                                                                                                                                                                                                                                                                                                                                                                                                                                                                                             |
| Complete List of Authors:       | Fogg, Alexandra; The Australian National University, Australian National University Medical School<br>Welsh, Jennifer; The Australian National University, National Centre for Epidemiology and Population Health (NCEPH)<br>Banks, Emily; The Australian National University, National Centre for Epidemiology and Population Health, Research School of Population Health; The Sax Institute<br>Abhayaratna, Walter; Canberra Hospital, Division of Medicine; The Australian National University, College of Health and Medicine<br>Korda, Rosemary; The Australian National University, National Centre for Epidemiology and Population Health, Research School of Population Health |
| <b>Primary Subject Heading</b>: | Cardiovascular medicine                                                                                                                                                                                                                                                                                                                                                                                                                                                                                                                                                                                                                                                                 |
| Secondary Subject Heading:      | Health services research                                                                                                                                                                                                                                                                                                                                                                                                                                                                                                                                                                                                                                                                |
| Keywords:                       | Coronary heart disease < CARDIOLOGY, Coronary intervention < CARDIOLOGY, Cardiac Epidemiology < CARDIOLOGY                                                                                                                                                                                                                                                                                                                                                                                                                                                                                                                                                                              |
|                                 |                                                                                                                                                                                                                                                                                                                                                                                                                                                                                                                                                                                                                                                                                         |

SCHOLARONE™  
Manuscripts

**Title**

Variation in cardiovascular disease care: An Australian cohort study on sex differences in receipt of coronary procedures

**Authors**

Alexandra J. Fogg<sup>1</sup>, Jennifer Welsh<sup>2</sup>, Emily Banks<sup>2,3</sup>, Walter P. Abhayaratna<sup>4</sup> & Rosemary J. Korda<sup>2</sup>.

**Affiliations**

1. Australian National University Medical School, Australian National University, Canberra, Australia
2. National Centre for Epidemiology and Population Health, Research School of Population Health, Australian National University, Canberra, Australia
3. The Sax Institute, Sydney, Australia
4. College of Health and Medicine, Australian National University, Canberra, Australia

**Corresponding Author:**

Rosemary J. Korda

Mailing address: 62 Mills Road, Acton, ACT, Australia 2601

Ph: +61 2 6125 5583

[rosemary.korda@anu.edu.au](mailto:rosemary.korda@anu.edu.au)

Word Count: 3,149

**ABSTRACT**

**Objectives:** To quantify sex differences in diagnostic and revascularisation coronary procedures within one year of hospitalisation for acute myocardial infarction (AMI) or angina.

**Design:** Prospective cohort study. Baseline questionnaire (January 2006-April 2009) data from the Sax Institute's 45 and Up Study were linked to hospitalisation and mortality data (to 30 June 2016) in a time-to-event analysis, treating death as a censoring event.

**Setting:** New South Wales, Australia.

**Participants:** Participants aged  $\geq 45$  years with no history of IHD who were admitted to hospital with a primary diagnosis of AMI (n=4,580), or a primary diagnosis of angina or chronic IHD with secondary diagnosis of angina (n=4,457).

**Outcome Measures:** Coronary angiography and coronary revascularisation with percutaneous coronary intervention or coronary artery bypass graft (PCI/CABG) within one year of index admission. Cox regression models compared coronary procedure rates in men and women, adjusting sequentially for age, sociodemographic variables and health characteristics.

**Results:** Among AMI patients, 71.6% of men (crude rate: 3.45/person-year) and 64.7% of women (2.62/person-year) received angiography; 57.8% of men (1.73/person year) and 37.4% of women (0.77/person-year) received PCI/CABG. Adjusted hazard ratios (HRs) for men versus women were 1.00(0.92-1.08) for angiography and 1.51(1.38-1.67) for PCI/CABG. In the angina group, 71.6% of men (crude rate: 2.36/person-year) and 64.7% of women (1.32/person-year) received angiography; 57.8% of men (0.90/person-year) and 37.4% of women (0.26/person-year) received PCI/CABG. Adjusted HRs were 1.24(1.14-1.34) and 2.44(2.16-2.75) respectively.

**Conclusions:** Men are more likely than women to receive coronary procedures, particularly revascularisation. This difference is most evident among people with angina, where care is more discretionary compared to AMI.

**Keywords:** Cardiovascular disease, Coronary procedure, Linked data, 45 and Up Study, Health inequality

## ARTICLE SUMMARY

### Strengths and limitations of this study

- This study uses population-based survey data linked to routinely collected health data.
- This study has a relatively large number of participants, with virtually complete capture of procedures.
- This study has adjusted for a large range of baseline sociodemographic and health factors, however clinical factors upon presentation were not included.
- While diagnosis of AMI is highly valid within hospital data, there is relatively low concordance for angina diagnoses, with possible over- or underrepresentation of rates.
- The study cohort, while broadly representative of the general population, is likely to be healthier and have lower hospitalisation and mortality rates than their peers.

## BACKGROUND

Cardiovascular disease (CVD) is the leading cause of morbidity and mortality worldwide,[1] and a leading cause of death in Australia.[2] While incidence of CVD is higher among men,[3] in many parts of the world women experience worse outcomes.[4] Coronary interventions, including percutaneous coronary intervention (PCI) and coronary artery bypass grafting (CABG), contribute to improved outcomes following an acute coronary event in both men and women.[4] Despite the significant disease burden and availability of effective interventions, CVD in women as a whole remains underdiagnosed and less aggressively treated.[5, 6] Women are underrepresented in clinical trials,[6] and there are important gaps in the evidence for recognition and treatment of adverse coronary events.

It is known that incident acute myocardial infarction (AMI) and angina pectoris present on average 7-10 years later in women compared to men.[6, 7] Women generally present to hospital older and with a greater number of risk factors than men,[6] experiencing higher mortality and re-infarction rates following a first AMI.[7] Disparities in care received by women compared to men have been documented in the United States (US), even when accounting for income, education and site of care.[8] Evidence from Europe and the US demonstrate that women with CVD are less likely to undergo diagnostic angiograms or intervention with PCI or CABG,[6, 7] procedures with documented clinical benefit.[4, 5]

There is limited information on sex differences in cardiovascular care in Australia, including diagnosis and management with coronary procedures. Age-standardised rates of procedures are lower among women compared to men,[9] however underlying CVD and other factors related to delivery of care are not taken into consideration in these figures. Hence, the extent to which these differences in rates reflect inequalities in care is uncertain. This study aimed to quantify sex differences in care delivery by comparing coronary procedure rates in men and women admitted with AMI or angina, adjusting for other sociodemographic and health-related factors.



## METHODS

### Data sources

Data were obtained from the Sax Institute's 45 and Up Study, a population-based cohort study involving 267,153 men and women aged 45 and over from New South Wales (NSW) Australia. 45 and Up Study participants were randomly selected from the Department of Human Services (formerly Medicare Australia) database, Australia's universal health insurance system, with oversampling of individuals living in rural areas and those over the age of 80 by a factor of 2. All individuals living in remote areas were invited to participate. Participants enrolled by completing a mailed self-administered questionnaire and provided signed consent for long-term follow-up and data-linkage with a range of health databases. Approximately 10% of the NSW population aged 45 and over were included in the sample, an overall response rate of 18%. The Study is described in detail elsewhere,[10] with questionnaires available online.[11]

Baseline data from 45 and Up Study participants were linked to hospital data from the NSW Admitted Patient Data Collection (APDC, 1 July 2000 to 30 June 2016) and death data from the NSW Registry of Births, Deaths and Marriages and the National Death Index (1 January 2006 to 30 June 2016). The latter was linked by the Australian Institute of Health and Welfare. Included in the APDC is a record of all hospitalisations in NSW, dates of admission and discharge, and reason for admission. International Statistical Classification of Diseases and Related Health Problems, Tenth Revision, Australian Modification (ICD-10-AM) and Australian Classification of Health Interventions codes are incorporated into the APDC, with each record containing up to 51 diagnosis and 50 procedure codes. Death data included date of death (used for censoring as per time-to-event analysis), based on death from any cause.

Data were linked probabilistically by the Centre for Health Record linkage using personal information (full name, date of birth, sex, and address). It is likely that during the follow-up period a small but unknown number of participants may have moved interstate. Though hospitalisations in neighbouring states are not included, these are estimated to make up fewer than 2% of admissions in NSW residents. Follow-up for hospitalisations is considered to be ~98% complete among those who

1  
2  
3 continue to live in NSW. Quality assurance data on the data linkage show false positive and negative  
4 rates of <0.5% and <0.1% respectively.  
5  
6  
7  
8

### 9 10 **Study Population**

11 All 45 and Up Study participants admitted to hospital with a primary diagnosis of AMI or angina (stable  
12 or unstable) following entry into the 45 and Up Study were included in the sample. Those with a primary  
13 diagnosis of chronic ischaemic heart disease (IHD) and secondary diagnosis of angina were also  
14 included, due to the possibility of angina patients being admitted for elective revascularisation under  
15 these diagnostic codes. ICD-10-AM diagnosis codes I21 (acute myocardial infarction), I20 (angina  
16 pectoris), and I25 (chronic ischaemic heart disease), were used to ascertain admission. Note that these  
17 are clinicopathological diagnoses, with angina specifically referring to chest pain from insufficient  
18 myocardial oxygenation and coronary artery disease. I21 coding for AMI includes both ST-elevation  
19 and non-ST elevation myocardial infarcts, with current ICD-10 coding unable to reliably distinguish  
20 between these.[12]  
21  
22  
23  
24  
25  
26  
27  
28  
29  
30  
31

32 Participants with a prior history of IHD were excluded, defined as self-reported heart disease  
33 on the baseline questionnaire and/or admission to hospital for IHD (I20-I25), and/or a related  
34 interventional procedure (angiogram, PCI or CABG – defined below), as ascertained by diagnosis and  
35 procedure code fields of APDC in the six years prior to entering the 45 and Up Study.  
36  
37  
38  
39  
40  
41  
42

### 43 **Variables**

44 The study outcomes were investigation with angiography, and coronary intervention with PCI or  
45 CABG, within 12 months of index admission to hospital.  
46  
47  
48

49 Outcomes were ascertained using all 50 APDC procedure-code fields, coded using the  
50 Australian Classification of Health Interventions which is used in conjunction with ICD-10-AM,[13]:  
51 angiography (38215, 38218), PCI (35304-00, 35305-00, 35304-01, 35305-01, 38300-00, 38303-00  
52 (block: 670), 35310-00, 35310-01, 35310-02, 35310-03, 35310-05, 38306-00, 38306-01, 38306-02,  
53 38306-03, 38306-05 (block: 671)) and CABG (38497-00 to 38497-07, 38500-00 to 38500-04, 38503-  
54  
55  
56  
57  
58  
59  
60

1  
2  
3 00 to 38503-04, 90201-00 to 90201-03, *38500-05*, *38503-05* (blocks 672-679)). Italicised codes have  
4  
5 been included to reflect changes in procedure coding during the follow-up period.  
6

7 The main exposure of interest was sex (male or female), self-reported on the baseline  
8  
9 questionnaire. Sociodemographic and health characteristics that may confound/mediate the relationship  
10  
11 between sex and receipt of coronary procedures were also measured on the baseline questionnaire.  
12  
13 These included: country of birth (Australia/New Zealand or other), region of residence (major city,  
14  
15 inner regional, or outer regional/remote/very remote), highest qualification (no school certificate,  
16  
17 school/trade certificate or diploma, or tertiary degree), private health insurance (no private health  
18  
19 insurance, or health care/Department of Veterans Affairs concession card), marital status (married/de  
20  
21 facto, or not), obesity (body mass index (BMI)  $\geq 30$  kg/m<sup>2</sup>, or not, based on self-reported height and  
22  
23 weight), physical functioning (no/minor limitations, moderate limitations, or severe limitations, based  
24  
25 on levels of functional limitation, as adapted from the Medical Outcomes Score Physical Functioning  
26  
27 Subscale [14]), and psychological distress (low[10-<16], moderate[16-<22], or high[22-50], as per the  
28  
29 Kessler 10).[15]  
30  
31  
32  
33  
34

### 35 **Analysis**

36  
37 Cox proportional hazard regression was used to model the association between sex and receipt of  
38  
39 coronary procedures. For each analysis, participants contributed person-years from the date of index  
40  
41 admission for AMI or angina until either the specified outcome of interest, death from any cause, or  
42  
43 end of follow up 30 June 2016, whichever was the earliest, to a maximum of one calendar year. Data  
44  
45 from patients in the angina sample were also censored if they were subsequently admitted with AMI.  
46  
47 Proportional hazards assumption was tested, with the p-value set *a priori* to  $p < 0.01$ . All analyses were  
48  
49 conducted separately for patients whose index admission was for AMI, and for those whose index  
50  
51 admission was for angina. Patients presenting concurrently with AMI and angina were included in the  
52  
53 AMI sample.  
54

55 For each outcome, we calculated crude incidence rates separately for men and women, then ran  
56  
57 a series of Cox regression models to estimate hazard ratios (HRs) in relation to sex. Model 1 was  
58  
59 adjusted for age (5-year age categories from 45-54years through to  $\geq 85$ years). Model 2 was adjusted  
60

1  
2  
3 for age and sociodemographic variables (country of birth, region of residence, highest qualification,  
4 private health insurance and marital status). Model 3 was further adjusted for additional baseline health  
5 characteristics (obesity, physical functioning and psychological distress). Participants with missing  
6 values for covariates were included in the models, with missing coded as a separate category.  
7  
8  
9

10  
11 Multiple sensitivity analyses were performed. First, we used a maximum follow-up period of  
12 30 days after index admission rather than 12 months. Second, we used an alternative indicator of  
13 baseline health – self-rated health, measured with three categories (excellent/very good, good, fair/poor)  
14 – instead of functional limitation, obesity and psychological distress (Model 3). Third, we additionally  
15 controlled for comorbidity using the Charlson index,[16] using all diagnostic codes in the 12 months  
16 prior to the index admission, with scores categorised as 0, 1 or  $\geq 2$ . Fourth, we restricted analysis of the  
17 angina patients to those admitted with a primary diagnosis of unstable angina (ICD-10: I20.0). Further  
18 sensitivity analyses were performed, excluding patients who were aged 85 and older, and then  
19 controlling for additional patient factors of smoking, self-rated diabetes, treatment for high blood  
20 pressure, treatment for high cholesterol, and family history of heart disease.  
21  
22  
23  
24  
25  
26  
27  
28  
29  
30  
31

32 Analyses were performed using Stata 14.[17]  
33

34 The conduct of the 45 and Up Study was approved by the University of New South Wales  
35 Human Research Ethics Committee. Ethics approval for this study was obtained from the Australian  
36 National University Human Ethics Committee (2015/513) and the NSW Population and Health Services  
37 Research Ethics Committee (HREC/10/CIPHS/33; CI NSW Study Reference 2010/05/234).  
38  
39  
40  
41  
42  
43  
44

## 45 RESULTS

46  
47  
48 A total of 9,037 patients were included in the study, 4,580 admitted with AMI and 4,457 admitted with  
49 angina. There were no patients in the sample who had IHD as a primary diagnosis and angina as a  
50 secondary diagnosis. Sample characteristics are shown in Table 1. The profiles of patients within the  
51 AMI and angina groups were similar, with a few exceptions. Notably, those in the angina group were  
52 less likely to be aged 85 and over (8.56% vs 19.4%), and more likely to have private health insurance  
53  
54  
55  
56  
57  
58  
59  
60

1  
2  
3 at baseline (64.6% vs 56.9%) than those in the AMI group. There was a greater percentage of men  
4  
5 within both AMI and angina groups, 63.6% and 56.2% respectively.  
6  
7  
8  
9  
10  
11  
12  
13  
14  
15  
16  
17  
18  
19  
20  
21  
22  
23  
24  
25  
26  
27  
28  
29  
30  
31  
32  
33  
34  
35  
36  
37  
38  
39  
40  
41  
42  
43  
44  
45  
46  
47  
48  
49  
50  
51  
52  
53  
54  
55  
56  
57  
58  
59  
60

For peer review only

**Table 1:** Characteristics of patients admitted to hospital with acute myocardial infarction (AMI) or angina by sex

|                                      | AMI Sample (n=4,580) |      |       |      | Angina Sample (n=4,457) |      |       |      |
|--------------------------------------|----------------------|------|-------|------|-------------------------|------|-------|------|
|                                      | Men                  |      | Women |      | Men                     |      | Women |      |
|                                      | n                    | %    | n     | %    | n                       | %    | n     | %    |
| <b>Total</b>                         | 2911                 | 63.6 | 1669  | 36.4 | 2503                    | 56.2 | 1954  | 43.8 |
| <b>Age at admission</b>              |                      |      |       |      |                         |      |       |      |
| 45-54                                | 190                  | 6.5  | 80    | 4.8  | 152                     | 6.1  | 151   | 7.7  |
| 55-64                                | 685                  | 23.5 | 277   | 16.6 | 628                     | 25.1 | 499   | 25.5 |
| 65-74                                | 807                  | 27.7 | 414   | 24.8 | 897                     | 35.8 | 622   | 31.8 |
| 75-84                                | 757                  | 26.0 | 481   | 28.8 | 634                     | 25.3 | 493   | 25.2 |
| 85+                                  | 472                  | 16.2 | 417   | 25.0 | 192                     | 7.7  | 189   | 9.7  |
| <b>Region of residence</b>           |                      |      |       |      |                         |      |       |      |
| Major city                           | 1485                 | 51.0 | 807   | 48.4 | 1321                    | 52.8 | 972   | 49.7 |
| Inner regional                       | 1025                 | 35.2 | 629   | 37.7 | 886                     | 35.4 | 717   | 36.7 |
| Regional/remote                      | 354                  | 12.2 | 200   | 12.0 | 259                     | 10.4 | 237   | 12.1 |
| <b>Highest qualification</b>         |                      |      |       |      |                         |      |       |      |
| No school certificate                | 417                  | 14.3 | 357   | 21.4 | 305                     | 12.2 | 326   | 16.7 |
| School/ certificate/ diploma         | 1923                 | 66.1 | 1085  | 65.0 | 1629                    | 65.1 | 1310  | 67.0 |
| Tertiary degree                      | 497                  | 17.1 | 175   | 10.5 | 502                     | 20.1 | 276   | 14.1 |
| <b>Country of birth</b>              |                      |      |       |      |                         |      |       |      |
| Australia/ NZ                        | 2142                 | 73.6 | 1323  | 79.3 | 1888                    | 75.4 | 1576  | 80.7 |
| Other                                | 728                  | 25.0 | 327   | 19.6 | 583                     | 23.3 | 353   | 18.1 |
| <b>Marital status</b>                |                      |      |       |      |                         |      |       |      |
| Single                               | 647                  | 22.2 | 750   | 44.9 | 465                     | 18.6 | 638   | 32.7 |
| Married/ de facto                    | 2244                 | 77.1 | 916   | 54.9 | 2011                    | 80.3 | 1313  | 67.2 |
| <b>BMI</b>                           |                      |      |       |      |                         |      |       |      |
| Not obese (BMI<30kg/m <sup>2</sup> ) | 2079                 | 71.4 | 1100  | 65.9 | 1713                    | 68.4 | 1260  | 64.5 |
| Obese (BMI≥30kg/m <sup>2</sup> )     | 625                  | 21.5 | 394   | 23.6 | 619                     | 24.7 | 479   | 24.5 |
| <b>Physical functioning</b>          |                      |      |       |      |                         |      |       |      |
| No or minor limitation               | 1412                 | 48.5 | 469   | 28.1 | 1221                    | 48.8 | 691   | 35.4 |
| Moderate limitations                 | 646                  | 22.2 | 386   | 23.1 | 647                     | 25.9 | 517   | 26.5 |
| Severe limitations                   | 393                  | 13.5 | 392   | 23.5 | 301                     | 12.0 | 373   | 19.1 |
| <b>Psychological distress</b>        |                      |      |       |      |                         |      |       |      |
| Low                                  | 1958                 | 67.3 | 948   | 56.8 | 1681                    | 67.2 | 1131  | 57.9 |
| Moderate                             | 339                  | 11.7 | 205   | 12.3 | 337                     | 13.5 | 273   | 14.0 |
| High                                 | 188                  | 6.5  | 111   | 6.7  | 178                     | 7.1  | 172   | 8.8  |
| <b>Health Insurance</b>              |                      |      |       |      |                         |      |       |      |
| No private health insurance          | 1164                 | 40.0 | 807   | 48.4 | 845                     | 33.8 | 731   | 37.4 |
| Health care/DVA                      | 1746                 | 60.0 | 862   | 51.7 | 1658                    | 66.2 | 1223  | 62.6 |

% of missing cases: AMI sample (men, women): region of residence (1.6, 2.0); highest qualification (2.5, 3.1); country of birth (1.4, 1.1); marital status (0.7, 0.2); BMI (7.1, 10.5); physical limitations (15.8, 25.3); psychological distress (14.6, 24.3); health insurance (<0.1, 0.0). Angina sample (men, women): region of residence (1.5, 1.4); highest qualification (2.7, 2.2); country of birth (1.3, 1.3); marital status (1.1, 0.1); BMI (6.8, 11.0); physical limitations (13.3, 19.1); psychological distress (12.3, 19.3); health insurance (0.0, 0.0).

### Coronary procedures in AMI patients

Among those admitted to hospital with AMI, 69.1% received angiography, 71.6% of men vs 64.7% of women; and 50.4% underwent PCI/CABG, 57.8% vs 37.4% respectively. The proportion of AMI patients who survived the follow-up period and who had a procedure was 75.6% for angiography (77.6% v 71.9%), and 55.4% for PCI/CABG (63.2% vs 41.0%).

Crude rates per person-year of angiography were 3.45 (3.31-3.60) and 2.62 (2.47-2.78) in men and women respectively; and crude rates of PCI/CABG were 1.73 (1.64-1.81) and 0.77 (0.71-0.83) respectively (Table 2).

Cox models showed angiography rates were similar in men and women, with no difference after adjustment for sociodemographic and health variables (HR=1.00, 0.92-1.08) (Table 2). In contrast, rates for PCI/CABG were around 50% higher in men than women (adjusted HR=1.51, 1.38-1.67).

**Table 2:** Rates of coronary procedures within one year of admission with AMI by sex and associated hazard ratios (n=4,580)

|                    | Procedures/<br>pys | Crude rate per<br>py (95%CI) | Model 1<br>HR (95%CI) | Model 2<br>HR (95%CI) | Model 3<br>HR (95%CI) |
|--------------------|--------------------|------------------------------|-----------------------|-----------------------|-----------------------|
| <b>Angiography</b> |                    |                              |                       |                       |                       |
| Men                | 2085/604.1         | 3.45 (3.31-3.60)             | 1.08 (1.01-1.17)      | 1.02 (0.95-1.10)      | 1.00 (0.92-1.08)      |
| Women              | 1079/411.7         | 2.62 (2.47-2.78)             | 1.00                  | 1.00                  | 1.00                  |
| <b>PCI/CABG</b>    |                    |                              |                       |                       |                       |
| Men                | 1682/975.0         | 1.73 (1.64-1.81)             | 1.62 (1.48-1.78)      | 1.56 (1.42-1.71)      | 1.51 (1.38-1.67)      |
| Women              | 624/814.3          | 0.77 (0.71-0.83)             | 1.00                  | 1.00                  | 1.00                  |

Notes: py: person-year. Model 1 is adjusted for age at first admission. Model 2 is adjusted for age and sociodemographic variables (country of birth, region of residence, highest qualification, health insurance, marital status). Model 3 is adjusted for age, sociodemographic variables and health-related variables (obesity, physical functioning, psychological distress).

### Coronary procedures in angina patients

Among those admitted to hospital with angina, 61.9% received angiography, 67.3% of men vs 54.9% of women; and 33.6% underwent PCI/CABG, 44.6% vs 19.5% respectively. The proportion of angina patients who survived to the end of the follow-up period and who had a procedure was 62.4% for angiography (68.1% vs 55.1%), and 33.9% for PCI/CABG (45.3% vs 19.4%).

Crude rates for angiography were 2.36 (2.25-2.47) and 1.32 (1.24-1.40) for men and women respectively; and crude rates for PCI/CABG were 0.90 (0.85-0.95) and 0.26 (0.24-0.29) respectively (Table 3).

Cox models showed angiography rates were around 25% higher among men after adjusting for all factors (HR=1.24, 1.14-1.34). Rates for PCI/CABG in men were around 150% times those of women (adjusted HR=2.44, 2.16-2.75).

**Table 3:** Rates of coronary procedures within one year of admission with angina by sex and associated hazard ratios (n=4,457)

|                    | Procedures/<br>pys | Crude rate per<br>py (95%CI) | Model 1<br>HR (95%CI) | Model 2<br>HR (95%CI) | Model 3<br>HR (95%CI) |
|--------------------|--------------------|------------------------------|-----------------------|-----------------------|-----------------------|
| <b>Angiography</b> |                    |                              |                       |                       |                       |
| Men                | 1685/715.0         | 2.36 (2.25-2.47)             | 1.31 (1.21-1.41)      | 1.26 (1.16-1.36)      | 1.24 (1.14-1.34)      |
| Women              | 1072/814.3         | 1.32 (1.24-1.40)             | 1.00                  | 1.00                  | 1.00                  |
| <b>PCI/CABG</b>    |                    |                              |                       |                       |                       |
| Men                | 1117/1242.2        | 0.90 (0.85-0.95)             | 2.57 (2.28-2.88)      | 2.49 (2.21-2.80)      | 2.44 (2.16-2.75)      |
| Women              | 381/1450.8         | 0.26 (0.24-0.29)             | 1.00                  | 1.00                  | 1.00                  |

Notes: py: person-year. Model 1 is adjusted for age at first admission. Model 2 is adjusted for age and sociodemographic variables (country of birth, region of residence, highest qualification, health insurance, marital status). Model 3 is adjusted for age, sociodemographic variables and health-related variables (obesity, physical functioning, psychological distress).

There were no violations of the proportional hazards assumption for the sex variable in the models with 12 months of follow-up.

Sensitivity analyses using a 30-day follow-up period produced almost identical HRs (Supplementary Tables S1-S2). While violations of the proportional hazards assumption were found on testing in both the AMI and angina samples, there were no major violations detected in log-log plots. Hazard ratios were not materially different to those in the main analysis when adjusted for self-rated health as an alternative indicator of health (Tables S3-S4), when additionally adjusted for the Charlson index (Tables S5-S6), or when estimated on a sample restricted to patients admitted with a primary diagnosis of unstable angina (Table S7). Similarly, hazard ratios were not materially different to those in the main analysis when participants 85 and over were excluded from the sample (Tables S8 (AMI patients) and S9 (angina patients)), and when additionally adjusting for smoking, self-rated diabetes,



1  
2  
3 treatment for high blood pressure, treatment for high cholesterol, and family history of heart disease  
4  
5 (Table S10).  
6  
7  
8

## 9 10 **DISCUSSION**

11  
12 Our findings demonstrate clear sex differences in receipt of coronary procedures. Men were more likely  
13 to receive coronary revascularisation (PCI/CABG) for the management of AMI or angina. Differences  
14 in revascularisation rates were most pronounced among those admitted with angina, among whom men  
15 were also more likely to undergo diagnostic angiography.  
16  
17  
18  
19

20  
21 This study uses Australian data, with findings generally consistent with published evidence  
22 internationally. There is evidence from the US and Sweden that men are more likely than women to  
23 receive revascularisation procedures such as PCI or CABG following hospital admission with AMI or  
24 angina.[7, 18] Our finding that rates of PCI/CABG among men were 1.5 and 2.4 times those for women  
25 for AMI and angina respectively, is consistent with the above studies. A cohort study from the United  
26 Kingdom demonstrated this relationship for CABG, with men having twice the odds of receiving CABG  
27 than women (OR=1.90,1.21-3.00), however no difference in overall revascularisation rates was found  
28 (p=0.14).[19] Evidence regarding angiography is less consistent. There is evidence from the US,  
29 including a review, that suggests sex differences exist,[20, 21] however these considered acute coronary  
30 syndrome as a whole, rather than AMI and angina separately. No significant difference was found in  
31 the United Kingdom for receipt of CVD investigations, including angiography.[19] This is consistent  
32 with our findings on angiography in AMI patients, but differ from our findings in angina patients where  
33 we found a 25% difference in rates between men and women.  
34  
35  
36  
37  
38  
39  
40  
41  
42  
43  
44  
45  
46  
47

48  
49 Factors driving the observed sex differences in procedure rates are not known, however likely  
50 contributors include differences in clinical presentation. There are established sex differences in the  
51 pathophysiology, diagnosis and outcome of therapies related to AMI and angina.[7] For example,  
52 greater proportions of small vessel coronary disease among women, including Takotsubo  
53 cardiomyopathy and other forms of myocardial infarction with non-obstructive coronary arteries,[22]  
54 could contribute to lower rates of PCI/CABG following AMI. Previous studies have shown that women  
55  
56  
57  
58  
59  
60

1  
2  
3 who present with AMI or stable angina are more likely to have non-obstructive coronary artery disease  
4 compared to men, i.e. <50% stenosis of coronary arteries.[23,24]  
5  
6

7 Following CABG, women experience higher complication rates and increased mortality  
8 compared to men, a finding that is more pronounced in younger age groups.[6] While this may  
9 contribute to the lower rate of procedures among women, the directionality of this relationship cannot  
10 be assumed.  
11  
12  
13  
14

15 The use of questionnaire data linked to large-scale routine data enabled a wide range of personal  
16 characteristics and other factors to be included in models, such as socio-economic position and physical  
17 functioning, however clinical factors relating to patient presentation and symptom severity were not  
18 available in the dataset. A US review, however, concluded that clinical factors do not fully explain the  
19 discrepancies in procedure rates between sexes.[25] Thus, while we cannot exclude the possibility of  
20 the sex differences representing appropriate clinical care, this seems an unlikely explanation for the  
21 total observed variation in procedure rates, with multiple factors likely at play.[25]  
22  
23  
24  
25  
26  
27  
28  
29

30 Another possible explanation for our findings is unwarranted variation due to discrimination.  
31 This includes the possibility of unconscious gender bias, with one systematic review demonstrating  
32 implicit bias towards patients by healthcare professionals.[26] Australia's universal health system,  
33 providing free access to hospital care, should present few barriers to receiving equitable care. There are  
34 clear guidelines for the use of coronary procedures among patients presenting with AMI, however the  
35 use of procedures for those presenting with angina is more discretionary.[27] Sex differences found in  
36 receipt of coronary procedures, particularly for the more discretionary cases of angina, reinforce the  
37 suggestion that these differences reflect an inequality in care. This raises two distinct issues. First, the  
38 possible underuse of coronary procedures in women, which may indicate that the health care needs of  
39 a portion of Australians are not being adequately met, and second, the possible overuse of coronary  
40 procedures in men, which raises the question of waste within a health care system with limited  
41 resources.[27]  
42  
43  
44  
45  
46  
47  
48  
49  
50  
51  
52  
53  
54

55 Strengths of this study include the use of population-based survey data linked to routinely  
56 collected data. The number of participants included was relatively large, with virtually complete capture  
57 of procedures. Questionnaire and other data permitting, there was adjustment for a large range of  
58  
59  
60

1  
2  
3 baseline sociodemographic and health factors (most of which are not included in administrative data).  
4  
5 Additionally, the diagnosis of AMI is highly valid within hospital data, with sensitivity and specificity  
6 of  $\geq 86\%$  and a positive predictive value of  $\geq 93\%$ ,<sup>[28]</sup> and high concordance between diagnostic codes  
7 and physician review.<sup>[29]</sup> This is not true for angina however, where concordance is relatively low.<sup>[29]</sup>  
8  
9 This may have led to an over- or underestimation of procedure rates for angina. As only those admitted  
10 to hospital were included in this study, it is possible that some participants with angina, who could  
11 benefit from a coronary procedure, were not captured. While the 45 and Up Study cohort is broadly  
12 representative of the general population, participants are likely to be healthier and have lower  
13 hospitalisation and mortality rates than others in this age group, consistent with the healthy cohort  
14 effect.<sup>[30]</sup> However, while this may mean that the absolute rates of coronary procedures among those  
15 with coronary heart disease in this study differ from those of the general population, internal  
16 comparisons are unlikely to be influenced by this bias, hence relative rates in relation to sex are likely  
17 to remain valid.<sup>[31,32]</sup>  
18  
19  
20  
21  
22  
23  
24  
25  
26  
27  
28  
29  
30  
31  
32

### 33 CONCLUSION

34  
35  
36 Cardiovascular disease is a national health priority for Australia, with substantial morbidity and  
37 mortality. This study showed that men are more likely than women to receive coronary revascularisation  
38 procedures following admission to hospital with an AMI or angina. This relationship was particularly  
39 evident among the angina group, for whom care is more discretionary. While we cannot exclude that  
40 this discrepancy reflects appropriate care due to differences in clinical presentation, we must consider  
41 the possibility that sex differences, accounting for sociodemographic position and health-related factors,  
42 may indicate that the health care needs of a portion of the Australian population are not being adequately  
43 met. Morbidity and mortality among Australian women may be unnecessarily increased due to not  
44 receiving coronary intervention following AMI or angina. Alternatively, relative over-use in men  
45 cannot be ruled out. Either way, there is potential for health gain in elucidating and addressing this sex  
46 difference in receipt of coronary intervention, increasing awareness and delivery of best practice care.  
47  
48  
49  
50  
51  
52  
53  
54  
55  
56  
57  
58  
59  
60

## Abbreviations

CVD: Cardiovascular Disease; AMI: Acute Myocardial Infarction; NSW: New South Wales; APDC: NSW Admitted Patients Data Collection; ICD-10-AM: International statistical Classification of Diseases and related health problems, tenth revision, Australian Modification; PCI: Percutaneous Coronary Intervention; CABG: Coronary Artery Bypass Grafting; IHD: Ischaemic Heart Disease; HR: Hazard Ratio; CI: Confidence Interval; BMI: Body Mass Index; PY: person years.

## DECLARATIONS

### Ethics approval

Ethics approvals for this project were obtained from the NSW Population and Health Services Research Ethics Committee, the University of NSW Human Research Ethics Committee and the Australian National University Human Research Ethics Committee. Participants in the 45 and Up Study provided signed consent for linkage of their information to a range of health-related databases.

### Patient and Public Involvement

Not applicable. Patients were not involved in the development of this study.

### Availability of data and material

The datasets used during the current study are available upon application to the Sax Institute ([www.saxinstitute.org.au/our-work/45-up-study](http://www.saxinstitute.org.au/our-work/45-up-study)). To do so, one must have a scientifically sound and feasible research proposal, ethics approval for the proposal, data custodian approval for access to linked data, and be able to meet 45 and Up Study license and SURE user charges.

### Competing interests

The authors declare that they have no competing interests.

### Funding

1  
2  
3 This research was supported by a NSW CVRN Women and Heart Disease grant from the National  
4 Heart Foundation of Australia (101692). EB is supported by the National Health and Medical Research  
5 Council of Australia (1042717).  
6  
7  
8  
9

### 10 11 **Author's contributions**

12  
13 AF provided input into the study design, performed statistical analysis, interpreted the data and drafted  
14 the manuscript. JW provided input into the study design, performed statistical analysis and reviewed  
15 the manuscript. EB provided input into the study design and reviewed the manuscript. WA reviewed  
16 the manuscript. EB provided input into the study design and reviewed the manuscript. WA reviewed  
17 the manuscript. RK conceived and designed the study and assisted in writing the manuscript. All authors  
18 read and approved the final manuscript.  
19  
20  
21  
22  
23

### 24 25 **Acknowledgements**

26  
27 This research was completed using data collected through the 45 and Up Study  
28 (www.saxinstitute.org.au). The 45 and Up Study is managed by the Sax Institute in collaboration with  
29 major partner Cancer Council NSW; and partners: the National Heart Foundation of Australia (NSW  
30 Division); NSW Ministry of Health; NSW Government Family & Community Services – Ageing,  
31 Carers and the Disability Council NSW; and the Australian Red Cross Blood Service. We thank the  
32 many thousands of people participating in the 45 and Up Study. We also acknowledge the assistance of  
33 the Centre for Health Record Linkage.  
34  
35  
36  
37  
38  
39  
40  
41  
42  
43  
44

### 45 46 **REFERENCES**

- 47  
48  
49 1 GBD 2013 Mortality and Causes of Death Collaborators. Global, regional, and national age–  
50 sex specific all-cause and cause-specific mortality for 240 causes of death, 1990–2013: a  
51 systematic analysis for the Global Burden of Disease Study 2013. *Lancet* 2015;385:117-71 doi:  
52 10.1016/S0140-6736(14)61682-2.  
53  
54 2 Australian Bureau of Statistics. Causes of Death, Australia, 2016. In: Australian Bureau of  
55 Statistics, ed: Cat no. 3303.0. Canberra: ABS 2017.  
56  
57  
58  
59  
60

- 1  
2  
3 Australian Institute for Health and Welfare. Cardiovascular disease: Australian facts 2011. In:  
4 Cardiovascular disease series. Cat. no. CVD 53, ed. Canberra: AIHW 2011.  
5  
6  
7  
8 4 Pagidipati NJ, Peterson ED. Acute coronary syndromes in women and men. *Nat Rev Cardiol*  
9  
10 2016;13:471 10.1038/nrcardio.2016.89.  
11  
12 5 Mehta LS, Beckie TM, DeVon HA, *et al.* Acute Myocardial Infarction in Women: A Scientific  
13  
14 Statement From the American Heart Association *Circulation* 2016;133:00-  
15  
16 10.1161/CIR.0000000000000351.  
17  
18 6 Maas A, Appelman Y. Gender differences in coronary heart disease. *Neth Heart J*  
19  
20 2010;18:598-603 10.1007/s12471-010-0841-y.  
21  
22  
23 7 Bogaev RC. Gender Disparities Across the Spectrum of Advanced Cardiac Therapies: Real or  
24  
25 Imagined? *Curr Cardiol Rep* 2016;18:108 10.1007/s11886-016-0783-0.  
26  
27 8 Graham G. Acute Coronary Syndromes in Women: Recent Treatment Trends and Outcomes.  
28  
29 *Clin Med Insights Cardiol* 2016;10:CMC.S37145 10.4137/CMC.S37145.  
30  
31 9 Australian Institute of Health and Welfare. Women and heart disease: cardiovascular profile of  
32  
33 women in Australia. *Cardiovascular disease series no 33 Cat no CVD 49*. Canberra: AIHW  
34  
35 2010.  
36  
37 10 Banks E, Redman S, Jorm L, *et al.* Cohort profile: the 45 and up study. *Int J Epidemiol*  
38  
39 2008;37:941-7 10.1093/ije/dym184.  
40  
41  
42 11 The Sax Institute. Questionnaires. 2008.  
43  
44 12 Alexandrescu R, Bottle A, Jarman B, *et al.* Current ICD10 codes are insufficient to clearly  
45  
46 distinguish acute myocardial infarction type: a descriptive study. *BMC Health Serv Res*  
47  
48 2013;13:468 [10.1186/1472-6963-13-468](https://doi.org/10.1186/1472-6963-13-468).  
49  
50 13 National Centre for Classification in Health. The Australian classification of health  
51  
52 interventions (ACHI) 6th edition. Tabular list of interventions and alphabetic index of  
53  
54 interventions. Sydney 2007.  
55  
56  
57  
58  
59  
60

- 1  
2  
3 14 Smith DP, Weber MF, Soga K, *et al.* Relationship between Lifestyle and Health Factors and  
4 Severe Lower Urinary Tract Symptoms (LUTS) in 106,435 Middle-Aged and Older Australian  
5 Men: Population-Based Study. *PLoS One* 2014;9:e109278 10.1371/journal.pone.0109278.  
6  
7  
8  
9 15 Kessler RC, Andrews G, Colpe LJ, *et al.* Short screening scales to monitor population  
10 prevalences and trends in non-specific psychological distress. *Psychol Med* 2002;32:959-76  
11  
12  
13 16 Quan H, Li B, Couris CM, *et al.* Updating and Validating the Charlson Comorbidity Index and  
14 Score for Risk Adjustment in Hospital Discharge Abstracts Using Data From 6 Countries. *Am J*  
15 *Epidemiol* 2011;173:676-82 10.1093/aje/kwq433.  
16  
17  
18 17 StataCorp. Stata Statistical Software: Release 14. College Station, TX:StataCorp LP 2015.  
19  
20  
21 18 Haglund B, Köster M, Nilsson T, *et al.* Inequality in access to coronary revascularization in  
22 Sweden. *Scand Cardiovasc J* 2004;38:334-9 10.1080/14017430410021516.  
23  
24  
25 19 Raine RA, Black NA, Bowker TJ, *et al.* Gender differences in the management and outcome of  
26 patients with acute coronary artery disease. *J Epidemiol Community Health* 2002;56:791  
27  
28  
29 20 Redberg RF. Gender differences in acute coronary syndrome: invasive versus conservative  
30 approach. *Cardiol Rev* 2006;14:299-302 10.1097/01.crd.0000240901.89437.b8.  
31  
32  
33 21 Anand SS, Xie CC, Mehta S, *et al.* Differences in the Management and Prognosis of Women  
34 and Men Who Suffer From Acute Coronary Syndromes. *J Am Coll Cardiol* 2005;46:1845-51  
35  
36  
37 10.1016/j.jacc.2005.05.091.  
38  
39  
40 22 Agewall S, Beltrame JF, Reynolds HR, *et al.* ESC working group position paper on myocardial  
41 infarction with non-obstructive coronary arteries. *Eur Heart J* 2017;38:143-53  
42  
43  
44 10.1093/eurheartj/ehw149.  
45  
46  
47 23 Smilowitz NR, Mahajan AM, Roe MT *et al.* Mortality of Myocardial Infarction by Sex, Age,  
48 and Obstructive Coronary Artery Disease Status in the ACTION Registry-GWTG (Acute  
49 Coronary Treatment and Intervention Outcomes Network Registry-Get with the Guidelines).  
50  
51  
52 *Circ Cardiovasc Qual Outcomes.* 2017;10(12):e003443.  
53  
54  
55 24 Shaw LJ, SHAW RE, Merz CN *et al.* Impact of ethnicity and gender differences on  
56 angiographic coronary artery disease prevalence and in-hospital mortality in the American  
57  
58  
59  
60

- 1  
2  
3 College of Cardiology-National Cardiovascular Data Registry. *Circulation*. 2008;117:1787–  
4  
5 1801.  
6  
7  
8 25 Sheifer SE, Escarce JJ, Schulman KA. Race and sex differences in the management of coronary  
9  
10 artery disease. *Am Heart J* 2000;139:848-57 [https://doi.org/10.1016/S0002-8703\(00\)90017-6](https://doi.org/10.1016/S0002-8703(00)90017-6).  
11  
12 26 FitzGerald C, Hurst S. Implicit bias in healthcare professionals: a systematic review. *BMC Med*  
13  
14 *Ethics* 2017;18:19 10.1186/s12910-017-0179-8.  
15  
16 27 Korda RJ, Clements MS, Kelman CW. Universal health care no guarantee of equity:  
17  
18 Comparison of socioeconomic inequalities in the receipt of coronary procedures in patients  
19  
20 with acute myocardial infarction and angina. *BMC Public Health* 2009;9:460 10.1186/1471-  
21  
22 2458-9-460.  
23  
24 28 McCormick N, Lacaille D, Bhole V, *et al*. Validity of Myocardial Infarction Diagnoses in  
25  
26 Administrative Databases: A Systematic Review. *PLoS One* 2014;9(3):e92286  
27  
28 10.1371/journal.pone.0092286.  
29  
30 29 Heckbert SR, Kooperberg C, Safford MM, *et al*. Comparison of Self-Report, Hospital  
31  
32 Discharge Codes, and Adjudication of Cardiovascular Events in the Women's Health Initiative.  
33  
34 *Am J Epidemiol* 2004;160:1152-8 10.1093/aje/kwh314.  
35  
36 37 Lindsted KD, Fraser GE, Steinkohl M, *et al*. Healthy volunteer effect in a cohort study:  
38  
39 Temporal resolution in the adventist health study. *J Clin Epidemiol* 1996;49:783-90  
40  
41 10.1016/0895-4356(96)00009-1.  
42  
43 44 Mealing NM, Banks E, Jorm LR, *et al*. Investigation of relative risk estimates from studies of  
45  
46 the same population with contrasting response rates and designs. *BMC Med Res Methodol*  
47  
48 2010;10:26 10.1186/1471-2288-10-26.  
49  
50 32 Rothman KJ, Gallacher JEJ, Hatch EE. Why representativeness should be avoided. *Int J*  
51  
52 *Epidemiol* 2013;42:1012-4 10.1093/ije/dys223.  
53  
54  
55  
56  
57  
58  
59  
60



## Supplementary Material

**Variation in cardiovascular disease care: A cohort study on gender inequalities in receipt of coronary procedures**

**Table S1:** Rates of coronary procedures within 30 days of admission with AMI by gender and associated hazard ratios (n=4,580)

|                    | <b>Procedures/<br/>pys</b> | <b>Crude rate per py<br/>(95%CI)</b> | <b>Model 1<br/>HR (95%CI)</b> | <b>Model 2<br/>HR (95%CI)</b> | <b>Model 3<br/>HR (95%CI)</b> |
|--------------------|----------------------------|--------------------------------------|-------------------------------|-------------------------------|-------------------------------|
| <b>Angiography</b> |                            |                                      |                               |                               |                               |
| Men                | 2049/73.7                  | 27.8 (26.6-29.0)                     | 1.08 (1.00-1.16)              | 1.02 (0.95-1.10)              | 0.99 (0.92-1.07)              |
| Women              | 1060/48.9                  | 21.7 (20.4-23.0)                     | 1.00                          | 1.00                          | 1.00                          |
| <b>PCI/CABG</b>    |                            |                                      |                               |                               |                               |
| Men                | 1624/108.9                 | 14.9 (14.2-15.7)                     | 1.60(1.46-1.76)*              | 1.54(1.40-1.69)*              | 1.49(1.36-1.65)*              |
| Women              | 600/83.8                   | 7.15 (6.60-7.75)                     | 1.00                          | 1.00                          | 1.00                          |

Notes: py: person-year. Model 1 is adjusted for age at admission (in 5-year age categories). Model 2 is adjusted for age and sociodemographic variables (country of birth, region of residence, highest qualification, health insurance, marital status) Model 3 is adjusted for age, sociodemographic variables and health-related variables (obesity, physical functioning and psychological distress). \* indicates that the proportional hazard assumption is violated.

**Table S2:** Rates of coronary procedures within 30 days of admission with angina by gender and associated hazard ratios (n=4,457)

|                    | <b>Procedures<br/>/pys</b> | <b>Crude rate per py<br/>(95%CI)</b> | <b>Model 1<br/>HR (95%CI)</b> | <b>Model 2<br/>HR (95%CI)</b> | <b>Model 3<br/>HR (95%CI)</b> |
|--------------------|----------------------------|--------------------------------------|-------------------------------|-------------------------------|-------------------------------|
| <b>Angiography</b> |                            |                                      |                               |                               |                               |
| Men                | 1624/74.3                  | 21.9 (20.8-23.0)                     | 1.30 (1.20-1.40)              | 1.25 (1.15-1.35)              | 1.23 (1.13-1.33)              |
| Women              | 1026/79.0                  | 13.3 (12.5-14.1)                     | 1.00                          | 1.00                          | 1.00                          |
| <b>PCI/CABG</b>    |                            |                                      |                               |                               |                               |
| Men                | 1023/125.9                 | 8.13 (7.64-8.64)                     | 2.51(2.22-2.84)*              | 2.42(2.14-2.74)*              | 2.36(2.08-2.68)*              |
| Women              | 347/131.3                  | 2.64 (2.38-2.94)                     | 1.00                          | 1.00                          | 1.00                          |

Notes: py: person-year. Model 1 is adjusted for age at admission (in 5-year age categories). Model 2 is adjusted for age and sociodemographic variables (country of birth, region of residence, highest qualification, health insurance, marital status) Model 3 is adjusted for age, sociodemographic variables and health-related variables (obesity, physical functioning and psychological distress). \* indicates that the proportional hazard assumption is violated.

**Table S3:** Associated hazard ratios for coronary procedures within one year of admission with AMI by gender (n=4,580)

|                    | <b>Model 1<br/>HR (95% CI)</b> | <b>Model 2<br/>HR (95%CI)</b> | <b>Model 3<br/>HR (95%CI)</b> |
|--------------------|--------------------------------|-------------------------------|-------------------------------|
| <b>Angiography</b> |                                |                               |                               |
| Men                | 1.08 (1.01-1.17)               | 1.02 (0.95-1.10)              | 1.02 (0.94-1.10)              |
| Women              | 1.00                           | 1.00                          | 1.00                          |
| <b>PCI/CABG</b>    |                                |                               |                               |
| Men                | 1.62 (1.48-1.78)               | 1.56 (1.42-1.71)              | 1.55 (1.41-1.71)              |
| Women              | 1.00                           | 1.00                          | 1.00                          |

Notes: Model 1 is adjusted for age at admission (in 5-year age categories). Model 2 is adjusted for age and socio-variables (country of birth, region of residence, highest qualification, health insurance, marital status). Model 3 is adjusted for age, sociodemographic variables and health-related variables (self-rated health only).

**Table S4:** Associated hazard ratios for coronary procedures within one year of admission with angina by gender (n=4,457)

|                    | <b>Model 1<br/>HR (95% CI)</b> | <b>Model 2<br/>HR (95%CI)</b> | <b>Model 3<br/>HR (95%CI)</b> |
|--------------------|--------------------------------|-------------------------------|-------------------------------|
| <b>Angiography</b> |                                |                               |                               |
| Men                | 1.31 (1.21-1.41)               | 1.26 (1.16-1.36)              | 1.25 (1.16-1.36)              |
| Women              | 1.00                           | 1.00                          | 1.00                          |
| <b>PCI/CABG</b>    |                                |                               |                               |
| Men                | 2.57 (2.28-2.88)               | 2.49 (2.21-2.80)              | 2.50 (2.22-2.81)              |
| Women              | 1.00                           | 1.00                          | 1.00                          |

Notes: Model 1 is adjusted for age at admission (in 5-year age categories). Model 2 is adjusted for age and sociodemographic variables (country of birth, region of residence, highest qualification, health insurance, marital status). Model 3 is adjusted for age, sociodemographic variables and health-related variables (self-rated health only).

**Table S5:** Associated hazard ratios for coronary procedures within one year of admission with AMI by gender (n=4,580)

|                    | <b>Model 1</b><br><b>HR (95%CI)</b> | <b>Model 2</b><br><b>HR (95%CI)</b> | <b>Model 3</b><br><b>HR (95%CI)</b> |
|--------------------|-------------------------------------|-------------------------------------|-------------------------------------|
| <b>Angiography</b> |                                     |                                     |                                     |
| Men                | 1.08 (1.01-1.17)                    | 1.02 (0.95-1.10)                    | 1.00 (0.93-1.08)                    |
| Women              | 1.00                                | 1.00                                | 1.00                                |
| <b>PCI/CABG</b>    |                                     |                                     |                                     |
| Men                | 1.62 (1.48-1.78)                    | 1.56 (1.42-1.71)                    | 1.53 (1.39-1.68)                    |
| Women              | 1.00                                | 1.00                                | 1.00                                |

Notes: Model 1 is adjusted for age at admission (in 5-year age categories). Model 2 is adjusted for age and sociodemographic variables (country of birth, region of residence, highest qualification, health insurance, marital status). Model 3 is adjusted for age, sociodemographic variables and health-related variables (obesity, physical functioning, psychological distress and the Charlson index).

**Table S6:** Associated hazard ratios for coronary procedures within one year of admission with angina by gender (n=4,457)

|                    | <b>Model 1</b><br><b>HR (95%CI)</b> | <b>Model 2</b><br><b>HR (95%CI)</b> | <b>Model 3</b><br><b>HR (95%CI)</b> |
|--------------------|-------------------------------------|-------------------------------------|-------------------------------------|
| <b>Angiography</b> |                                     |                                     |                                     |
| Men                | 1.31 (1.21-1.41)                    | 1.26 (1.16-1.36)                    | 1.24 (1.14-1.34)                    |
| Women              | 1.00                                | 1.00                                | 1.00                                |
| <b>PCI/CABG</b>    |                                     |                                     |                                     |
| Men                | 2.57 (2.28-2.88)                    | 2.49 (2.21-2.80)                    | 2.46 (2.18-2.77)                    |
| Women              | 1.00                                | 1.00                                | 1.00                                |

Notes: Model 1 is adjusted for age at admission (in 5-year age categories). Model 2 is adjusted for age and sociodemographic variables (country of birth, region of residence, highest qualification, health insurance, marital status). Model 3 is adjusted for age, sociodemographic variables and health-related variables (obesity, physical functioning, psychological distress and the Charlson index).

**Table S7:** Rates for coronary procedures within one year of admission with unstable angina (I20.0) gender and associated hazard ratios (n=2,131)

|                    | Procedures<br>/pys | Crude rate per<br>py (95%CI) | Model 1<br>HR (95%CI) | Model 2<br>HR (95%CI) | Model 3<br>HR (95%CI) |
|--------------------|--------------------|------------------------------|-----------------------|-----------------------|-----------------------|
| <b>Angiography</b> |                    |                              |                       |                       |                       |
| Men                | 672/423.5          | 1.59 (1.47-1.71)             | 1.26 (1.12-1.42)      | 1.25 (1.11-1.41)      | 1.24 (1.10-1.40)      |
| Women              | 468/444.2          | 1.05 (0.96-1.15)             | 1.00                  | 1.00                  | 1.00                  |
| <b>PCI/CABG</b>    |                    |                              |                       |                       |                       |
| Men                | 420/650.1          | 0.64 (0.59-0.71)             | 2.52 (2.09-3.04)      | 2.50 (2.07-3.03)      | 2.50 (2.06-3.02)      |
| Women              | 151/729.8          | 0.21 (0.18-0.24)             | 1.00                  | 1.00                  | 1.00                  |

Notes: py: person-year. Model 1 is adjusted for age at admission (in 5-year age categories). Model 2 is further adjusted for country of birth, region of residence, highest qualification, marital status and health insurance. Model 3 is further adjusted for obesity, physical functioning and psychological distress.

**Table S8:** Rates of coronary procedures within one year of admission with AMI by sex and associated hazard ratios, excluding those aged 85 years and over (n=3691)

|                    | Procedures/<br>pys | Crude rate per<br>py (95%CI) | Model 1<br>HR (95%CI) | Model 2<br>HR (95%CI) | Model 3<br>HR (95%CI) |
|--------------------|--------------------|------------------------------|-----------------------|-----------------------|-----------------------|
| <b>Angiography</b> |                    |                              |                       |                       |                       |
| Men                | 1891/438.3         | 4.31 (4.12-4.51)             | 1.08 (0.99-1.16)      | 1.03 (0.95-1.12)      | 1.02 (0.94-1.1)       |
| Women              | 912/258.9          | 3.52 (3.3-3.76)              | 1.00                  | 1.00                  | 1.00                  |
| <b>PCI/CABG</b>    |                    |                              |                       |                       |                       |
| Men                | 1543/767.2         | 2.01 (1.91-2.11)             | 1.69 (1.53-1.87)      | 1.65 (1.49-1.82)      | 1.61 (1.46-1.79)      |
| Women              | 517/608.8          | 0.85 (0.78-0.93)             | 1.00                  | 1.00                  | 1.00                  |

Notes: py: person-year. Model 1 is adjusted for age at first admission. Model 2 is adjusted for age and sociodemographic variables (country of birth, region of residence, highest qualification, health insurance, marital status). Model 3 is adjusted for age, sociodemographic variables and health-related variables (obesity, physical functioning, psychological distress).

**Table S9:** Rates of coronary procedures within one year of admission with angina by sex and associated hazard ratios, excluding those aged 85 years and over (n=4076)

|                    | Procedures/<br>pys | Crude rate per<br>py (95%CI) | Model 1<br>HR (95%CI) | Model 2<br>HR (95%CI) | Model 3<br>HR (95%CI) |
|--------------------|--------------------|------------------------------|-----------------------|-----------------------|-----------------------|
| <b>Angiography</b> |                    |                              |                       |                       |                       |
| Men                | 1603/629.1         | 2.55 (2.43-2.68)             | 1.29 (1.19-1.4)       | 1.25 (1.16-1.36)      | 1.24 (1.14-1.34)      |
| Women              | 1010/707.2         | 1.43 (1.34-1.52)             | 1.00                  | 1.00                  | 1.00                  |
| <b>PCI/CABG</b>    |                    |                              |                       |                       |                       |
| Men                | 1066/1131.6        | 0.94 (0.89-1.00)             | 2.65 (2.35-2.99)      | 2.57 (2.28-2.91)      | 2.53 (2.23-2.86)      |
| Women              | 347/1322.5         | 0.26 (0.24-0.29)             | 1.00                  | 1.00                  | 1.00                  |

Notes: py: person-year. Model 1 is adjusted for age at first admission. Model 2 is adjusted for age and sociodemographic variables (country of birth, region of residence, highest qualification, health insurance, marital status). Model 3 is adjusted for age, sociodemographic variables and health-related variables (obesity, physical functioning, psychological distress).

**Table S10:** Hazard ratios for coronary procedures within one year of admission with AMI (n=4,580) or angina (n=4,457) (in relation to sex, adjusted for age, sociodemographic variables and health-related variables including cardiovascular risk factors)

|                    | <b>AMI<br/>HR (95%CI)</b> | <b>Angina<br/>HR (95%CI)</b> |
|--------------------|---------------------------|------------------------------|
| <b>Angiography</b> |                           |                              |
| Men                | 1.01 (0.93-1.09)          | 1.24 (1.14-1.34)             |
| Women              | 1.00                      | 1.00                         |
| <b>PCI/CABG</b>    |                           |                              |
| Men                | 1.52 (1.38-1.67)          | 2.45 (2.17-2.76)             |
| Women              | 1.00                      | 1.00                         |

Notes: Model 1 is adjusted for age at admission (in 5-year age categories). Model 2 is adjusted for age and socio-variables (country of birth, region of residence, highest qualification, health insurance, marital status). Model 3 is adjusted for age, sociodemographic variables health-related variables (obesity, physical functioning, psychological distress), and CVD risk factors (smoking, self-rated diabetes, treated for high blood pressure, treated for high cholesterol and family history of heart disease).

## STROBE Statement—checklist of items that should be included in reports of observational studies

|                           | Item No | Recommendation                                                                                                                                                                       | Manuscript page no. |
|---------------------------|---------|--------------------------------------------------------------------------------------------------------------------------------------------------------------------------------------|---------------------|
| <b>Title and abstract</b> | 1       | (a) Indicate the study's design with a commonly used term in the title or the abstract                                                                                               | 1                   |
|                           |         | (b) Provide in the abstract an informative and balanced summary of what was done and what was found                                                                                  | 2                   |
| <b>Introduction</b>       |         |                                                                                                                                                                                      |                     |
| Background/rationale      | 2       | Explain the scientific background and rationale for the investigation being reported                                                                                                 | 4                   |
| Objectives                | 3       | State specific objectives, including any prespecified hypotheses                                                                                                                     | 4                   |
| <b>Methods</b>            |         |                                                                                                                                                                                      |                     |
| Study design              | 4       | Present key elements of study design early in the paper                                                                                                                              | 5-6                 |
| Setting                   | 5       | Describe the setting, locations, and relevant dates, including periods of recruitment, exposure, follow-up, and data collection                                                      | 5-6                 |
| Participants              | 6       | <i>Cross-sectional study</i> —Give the eligibility criteria, and the sources and methods of selection of participants                                                                | n/a                 |
|                           |         | (b) <i>Cohort study</i> —For matched studies, give matching criteria and number of exposed and unexposed                                                                             | 6                   |
|                           |         | <i>Case-control study</i> —For matched studies, give matching criteria and the number of controls per case                                                                           |                     |
| Variables                 | 7       | Clearly define all outcomes, exposures, predictors, potential confounders, and effect modifiers. Give diagnostic criteria, if applicable                                             | 6-7                 |
| Data sources/measurement  | 8       | For each variable of interest, give sources of data and details of methods of assessment (measurement). Describe comparability of assessment methods if there is more than one group | 6-7                 |
| Bias                      | 9       | Describe any efforts to address potential sources of bias                                                                                                                            | 7-8                 |
| Study size                | 10      | Explain how the study size was arrived at                                                                                                                                            | 6                   |
| Quantitative variables    | 11      | Explain how quantitative variables were handled in the analyses. If applicable, describe which groupings were chosen and why                                                         | 7                   |
| Statistical methods       | 12      | (a) Describe all statistical methods, including those used to control for confounding                                                                                                | 7-8                 |
|                           |         | (b) Describe any methods used to examine subgroups and interactions                                                                                                                  | n/a                 |
|                           |         | (c) Explain how missing data were addressed                                                                                                                                          | 8                   |
|                           |         | <i>Cross-sectional study</i> —If applicable, describe analytical methods taking account of sampling strategy                                                                         | n/a                 |
|                           |         | (e) Describe any sensitivity analyses                                                                                                                                                | 8                   |

Continued on next page

| <b>Results</b>           |    |                                                                                                                                                                                                              | <b>Manuscript page no.</b>  |
|--------------------------|----|--------------------------------------------------------------------------------------------------------------------------------------------------------------------------------------------------------------|-----------------------------|
| Participants             | 13 | (a) Report numbers of individuals at each stage of study—eg numbers potentially eligible, examined for eligibility, confirmed eligible, included in the study, completing follow-up, and analysed            | 8                           |
|                          |    | (b) Give reasons for non-participation at each stage                                                                                                                                                         | n/a                         |
|                          |    | (c) Consider use of a flow diagram                                                                                                                                                                           | n/a                         |
| Descriptive data         | 14 | (a) Give characteristics of study participants (eg demographic, clinical, social) and information on exposures and potential confounders                                                                     | 8-9                         |
|                          |    | (b) Indicate number of participants with missing data for each variable of interest                                                                                                                          | Table 1                     |
|                          |    | (c) <i>Cohort study</i> —Summarise follow-up time (eg, average and total amount)                                                                                                                             | 11                          |
| Outcome data             | 15 | <i>Cohort study</i> —Report numbers of outcome events or summary measures over time                                                                                                                          | Tables 2 and 3              |
|                          |    | <i>Case-control study</i> —Report numbers in each exposure category, or summary measures of exposure                                                                                                         | n/a                         |
|                          |    | <i>Cross-sectional study</i> —Report numbers of outcome events or summary measures                                                                                                                           | n/a                         |
| Main results             | 16 | (a) Give unadjusted estimates and, if applicable, confounder-adjusted estimates and their precision (eg, 95% confidence interval). Make clear which confounders were adjusted for and why they were included | Tables 2 and 3              |
|                          |    | (b) Report category boundaries when continuous variables were categorized                                                                                                                                    | n/a                         |
|                          |    | (c) If relevant, consider translating estimates of relative risk into absolute risk for a meaningful time period                                                                                             | n/a                         |
| Other analyses           | 17 | Report other analyses done—eg analyses of subgroups and interactions, and sensitivity analyses                                                                                                               | 12 and Supplementary Tables |
| <b>Discussion</b>        |    |                                                                                                                                                                                                              |                             |
| Key results              | 18 | Summarise key results with reference to study objectives                                                                                                                                                     | 13                          |
| Limitations              | 19 | Discuss limitations of the study, taking into account sources of potential bias or imprecision. Discuss both direction and magnitude of any potential bias                                                   | 15                          |
| Interpretation           | 20 | Give a cautious overall interpretation of results considering objectives, limitations, multiplicity of analyses, results from similar studies, and other relevant evidence                                   | 15                          |
| Generalisability         | 21 | Discuss the generalisability (external validity) of the study results                                                                                                                                        | 15                          |
| <b>Other information</b> |    |                                                                                                                                                                                                              |                             |
| Funding                  | 22 | Give the source of funding and the role of the funders for the present study and, if applicable, for the original study on which the present article is based                                                | 17                          |

# BMJ Open

## Variation in cardiovascular disease care: An Australian cohort study on sex differences in receipt of coronary procedures.

|                                 |                                                                                                                                                                                                                                                                                                                                                                                                                                                                                                                                                                                                                                                                                         |
|---------------------------------|-----------------------------------------------------------------------------------------------------------------------------------------------------------------------------------------------------------------------------------------------------------------------------------------------------------------------------------------------------------------------------------------------------------------------------------------------------------------------------------------------------------------------------------------------------------------------------------------------------------------------------------------------------------------------------------------|
| Journal:                        | <i>BMJ Open</i>                                                                                                                                                                                                                                                                                                                                                                                                                                                                                                                                                                                                                                                                         |
| Manuscript ID                   | bmjopen-2018-026507.R2                                                                                                                                                                                                                                                                                                                                                                                                                                                                                                                                                                                                                                                                  |
| Article Type:                   | Research                                                                                                                                                                                                                                                                                                                                                                                                                                                                                                                                                                                                                                                                                |
| Date Submitted by the Author:   | 15-Mar-2019                                                                                                                                                                                                                                                                                                                                                                                                                                                                                                                                                                                                                                                                             |
| Complete List of Authors:       | Fogg, Alexandra; The Australian National University, Australian National University Medical School<br>Welsh, Jennifer; The Australian National University, National Centre for Epidemiology and Population Health (NCEPH)<br>Banks, Emily; The Australian National University, National Centre for Epidemiology and Population Health, Research School of Population Health; The Sax Institute<br>Abhayaratna, Walter; Canberra Hospital, Division of Medicine; The Australian National University, College of Health and Medicine<br>Korda, Rosemary; The Australian National University, National Centre for Epidemiology and Population Health, Research School of Population Health |
| <b>Primary Subject Heading</b>: | Cardiovascular medicine                                                                                                                                                                                                                                                                                                                                                                                                                                                                                                                                                                                                                                                                 |
| Secondary Subject Heading:      | Health services research                                                                                                                                                                                                                                                                                                                                                                                                                                                                                                                                                                                                                                                                |
| Keywords:                       | Coronary heart disease < CARDIOLOGY, Coronary intervention < CARDIOLOGY, Cardiac Epidemiology < CARDIOLOGY                                                                                                                                                                                                                                                                                                                                                                                                                                                                                                                                                                              |
|                                 |                                                                                                                                                                                                                                                                                                                                                                                                                                                                                                                                                                                                                                                                                         |

SCHOLARONE™  
Manuscripts



**Title**

Variation in cardiovascular disease care: An Australian cohort study on sex differences in receipt of coronary procedures

**Authors**

Alexandra J. Fogg<sup>1</sup>, Jennifer Welsh<sup>2</sup>, Emily Banks<sup>2,3</sup>, Walter P. Abhayaratna<sup>4</sup> & Rosemary J. Korda<sup>2</sup>.

**Affiliations**

1. Australian National University Medical School, Australian National University, Canberra, Australia
2. National Centre for Epidemiology and Population Health, Research School of Population Health, Australian National University, Canberra, Australia
3. The Sax Institute, Sydney, Australia
4. College of Health and Medicine, Australian National University, Canberra, Australia

**Corresponding Author:**

Rosemary J. Korda

Mailing address: 62 Mills Road, Acton, ACT, Australia 2601

Ph: +61 2 6125 5583

[rosemary.korda@anu.edu.au](mailto:rosemary.korda@anu.edu.au)

Word Count: 3,272

**ABSTRACT**

**Objectives:** To quantify sex differences in diagnostic and revascularisation coronary procedures within one year of hospitalisation for acute myocardial infarction (AMI) or angina.

**Design:** Prospective cohort study. Baseline questionnaire (January 2006-April 2009) data from the Sax Institute's 45 and Up Study were linked to hospitalisation and mortality data (to 30 June 2016) in a time-to-event analysis, treating death as a censoring event.

**Setting:** New South Wales, Australia.

**Participants:** Participants aged  $\geq 45$  years with no history of IHD who were admitted to hospital with a primary diagnosis of AMI (n=4,580), or a primary diagnosis of angina or chronic IHD with secondary diagnosis of angina (n=4,457).

**Outcome Measures:** Coronary angiography and coronary revascularisation with percutaneous coronary intervention or coronary artery bypass graft (PCI/CABG) within one year of index admission. Cox regression models compared coronary procedure rates in men and women, adjusting sequentially for age, sociodemographic variables and health characteristics.

**Results:** Among AMI patients, 71.6% of men (crude rate: 3.45/person-year) and 64.7% of women (2.62/person-year) received angiography; 57.8% of men (1.73/person year) and 37.4% of women (0.77/person-year) received PCI/CABG. Adjusted hazard ratios (HRs) for men versus women were 1.00(0.92-1.08) for angiography and 1.51(1.38-1.67) for PCI/CABG. In the angina group, 71.6% of men (crude rate: 2.36/person-year) and 64.7% of women (1.32/person-year) received angiography; 57.8% of men (0.90/person-year) and 37.4% of women (0.26/person-year) received PCI/CABG. Adjusted HRs were 1.24(1.14-1.34) and 2.44(2.16-2.75) respectively.

**Conclusions:** Men are more likely than women to receive coronary procedures, particularly revascularisation. This difference is most evident among people with angina, where clinical guidelines are less prescriptive than for AMI.

**Keywords:** Cardiovascular disease, Coronary procedure, Linked data, 45 and Up Study, Health inequality

## ARTICLE SUMMARY

### Strengths and limitations of this study

- This study uses population-based survey data linked to routinely collected health data.
- This study has a relatively large number of participants, with virtually complete capture of procedures.
- This study has adjusted for a large range of baseline sociodemographic and health factors, however clinical factors upon presentation were not included.
- While diagnosis of AMI is highly valid within hospital data, there is relatively low concordance for angina diagnoses, with possible over- or underrepresentation of rates.
- The study cohort, while broadly representative of the general population, is likely to be healthier and have lower hospitalisation and mortality rates than their peers.

## BACKGROUND

Cardiovascular disease (CVD) is the leading cause of morbidity and mortality worldwide,[1] and a leading cause of death in Australia.[2] While incidence of CVD is higher among men,[3] in many parts of the world women experience worse outcomes.[4] Coronary interventions, including percutaneous coronary intervention (PCI) and coronary artery bypass grafting (CABG), contribute to improved outcomes following an acute coronary event in both men and women.[4] Despite the significant disease burden and availability of effective interventions, CVD in women as a whole remains underdiagnosed and less aggressively treated.[5, 6] Women are underrepresented in clinical trials,[6] and there are important gaps in the evidence for recognition and treatment of adverse coronary events.

It is known that incident acute myocardial infarction (AMI) and angina pectoris present on average 7-10 years later in women compared to men.[6, 7] Women generally present to hospital older and with a greater number of risk factors than men,[6] experiencing higher mortality and re-infarction rates following a first AMI.[7] Disparities in care received by women compared to men have been documented in the United States (US), even when accounting for income, education and site of care.[8] Evidence from Europe and the US demonstrate that women with CVD are less likely to undergo diagnostic angiograms or intervention with PCI or CABG,[6, 7] procedures with documented clinical benefit.[4, 5]

There is limited information on sex differences in cardiovascular care in Australia, including diagnosis and management with coronary procedures. Age-standardised rates of procedures are lower among women compared to men,[9] however underlying CVD and other factors related to delivery of care are not taken into consideration in these figures. Hence, the extent to which these differences in rates reflect inequalities in care is uncertain. This study aimed to quantify sex differences in care delivery by comparing coronary procedure rates in men and women admitted with AMI or angina, adjusting for other sociodemographic and health-related factors.

## METHODS

### Data sources

Data were obtained from the Sax Institute's 45 and Up Study, a population-based cohort study involving 267,153 men and women aged 45 and over from New South Wales (NSW) Australia. 45 and Up Study participants were randomly selected from the Department of Human Services (formerly Medicare Australia) database, Australia's universal health insurance system, with oversampling of individuals living in rural areas and those over the age of 80 by a factor of 2. All individuals living in remote areas were invited to participate. Participants enrolled by completing a mailed self-administered questionnaire and provided signed consent for long-term follow-up and data-linkage with a range of health databases. Approximately 10% of the NSW population aged 45 and over were included in the sample, an overall response rate of 18%. The Study is described in detail elsewhere,[10] with questionnaires available online.[11]

Baseline data from 45 and Up Study participants were linked to hospital data from the NSW Admitted Patient Data Collection (APDC, 1 July 2000 to 30 June 2016) and death data from the NSW Registry of Births, Deaths and Marriages and the National Death Index (1 January 2006 to 30 June 2016). The latter was linked by the Australian Institute of Health and Welfare. Included in the APDC is a record of all hospitalisations in NSW, dates of admission and discharge, and reason for admission. International Statistical Classification of Diseases and Related Health Problems, Tenth Revision, Australian Modification (ICD-10-AM) and Australian Classification of Health Interventions codes are incorporated into the APDC, with each record containing up to 51 diagnosis and 50 procedure codes. Death data included date of death (used for censoring as per time-to-event analysis), based on death from any cause.

Data were linked probabilistically by the Centre for Health Record linkage using personal information (full name, date of birth, sex, and address). It is likely that during the follow-up period a small but unknown number of participants may have moved interstate. Though hospitalisations in neighbouring states are not included, these are estimated to make up fewer than 2% of admissions in NSW residents. Follow-up for hospitalisations is considered to be ~98% complete among those who

1  
2  
3 continue to live in NSW. Quality assurance data on the data linkage show false positive and negative  
4 rates of <0.5% and <0.1% respectively.  
5  
6  
7  
8

### 9 10 **Study Population**

11 All 45 and Up Study participants admitted to hospital with a primary diagnosis of AMI or angina (stable  
12 or unstable) following entry into the 45 and Up Study were included in the sample. Those with a primary  
13 diagnosis of chronic ischaemic heart disease (IHD) and secondary diagnosis of angina were also  
14 included, due to the possibility of angina patients being admitted for elective revascularisation under  
15 these diagnostic codes. ICD-10-AM diagnosis codes I21 (acute myocardial infarction), I20 (angina  
16 pectoris), and I25 (chronic ischaemic heart disease), were used to ascertain admission. Note that these  
17 are clinicopathological diagnoses, with angina specifically referring to chest pain from insufficient  
18 myocardial oxygenation and coronary artery disease. I21 coding for AMI includes both ST-elevation  
19 and non-ST elevation myocardial infarcts, with current ICD-10 coding unable to reliably distinguish  
20 between these.[12]  
21  
22  
23  
24  
25  
26  
27  
28  
29  
30  
31

32 Participants with a prior history of IHD were excluded, defined as self-reported heart disease  
33 on the baseline questionnaire and/or admission to hospital for IHD (I20-I25), and/or a related  
34 interventional procedure (angiogram, PCI or CABG – defined below), as ascertained by diagnosis and  
35 procedure code fields of APDC in the six years prior to entering the 45 and Up Study.  
36  
37  
38  
39  
40  
41  
42

### 43 **Variables**

44 The study outcomes were investigation with angiography, and coronary intervention with PCI or  
45 CABG, within 12 months of index admission to hospital.  
46  
47  
48

49 Outcomes were ascertained using all 50 APDC procedure-code fields, coded using the  
50 Australian Classification of Health Interventions which is used in conjunction with ICD-10-AM,[13]:  
51 angiography (38215, 38218), PCI (35304-00, 35305-00, 35304-01, 35305-01, 38300-00, 38303-00  
52 (block: 670), 35310-00, 35310-01, 35310-02, 35310-03, 35310-05, 38306-00, 38306-01, 38306-02,  
53 38306-03, 38306-05 (block: 671)) and CABG (38497-00 to 38497-07, 38500-00 to 38500-04, 38503-  
54  
55  
56  
57  
58  
59  
60

1  
2  
3 00 to 38503-04, 90201-00 to 90201-03, *38500-05*, *38503-05* (blocks 672-679)). Italicised codes have  
4  
5 been included to reflect changes in procedure coding during the follow-up period.  
6

7 The main exposure of interest was sex (male or female), self-reported on the baseline  
8 questionnaire. Sociodemographic and health characteristics that may confound/mediate the relationship  
9 between sex and receipt of coronary procedures were also measured on the baseline questionnaire.  
10 These included: country of birth (Australia/New Zealand or other), region of residence (major city,  
11 inner regional, or outer regional/remote/very remote), highest qualification (no school certificate,  
12 school/trade certificate or diploma, or tertiary degree), private health insurance (no private health  
13 insurance, or health care/Department of Veterans Affairs concession card), marital status (married/de  
14 facto, or not), obesity (body mass index (BMI)  $\geq 30$  kg/m<sup>2</sup>, or not, based on self-reported height and  
15 weight), physical functioning (no/minor limitations, moderate limitations, or severe limitations, based  
16 on levels of functional limitation, as adapted from the Medical Outcomes Score Physical Functioning  
17 Subscale [14]), and psychological distress (low[10-<16], moderate[16-<22], or high[22-50], as per the  
18 Kessler 10).[15]  
19  
20  
21  
22  
23  
24  
25  
26  
27  
28  
29  
30  
31  
32  
33  
34

### 35 **Analysis**

36 Cox proportional hazard regression was used to model the association between sex and receipt of  
37 coronary procedures. For each analysis, participants contributed person-years from the date of index  
38 admission for AMI or angina until either the specified outcome of interest, death from any cause, or  
39 end of follow up 30 June 2016, whichever was the earliest, to a maximum of one calendar year. Data  
40 from patients in the angina sample were also censored if they were subsequently admitted with AMI.  
41 Proportional hazards assumption was tested, with the p-value set *a priori* to  $p < 0.01$ . All analyses were  
42 conducted separately for patients whose index admission was for AMI, and for those whose index  
43 admission was for angina. Patients presenting concurrently with AMI and angina were included in the  
44 AMI sample.  
45  
46  
47  
48  
49  
50  
51  
52  
53  
54

55 For each outcome, we calculated crude incidence rates separately for men and women, then ran  
56 a series of Cox regression models to estimate hazard ratios (HRs) in relation to sex. Model 1 was  
57 adjusted for age (5-year age categories from 45-54years through to  $\geq 85$ years). Model 2 was adjusted  
58  
59  
60

1  
2  
3 for age and sociodemographic variables (country of birth, region of residence, highest qualification,  
4 private health insurance and marital status). Model 3 was further adjusted for additional baseline health  
5 characteristics (obesity, physical functioning and psychological distress). Participants with missing  
6 values for covariates were included in the models, with missing coded as a separate category.  
7  
8  
9

10  
11 Multiple sensitivity analyses were performed. First, we used a maximum follow-up period of  
12 30 days after index admission rather than 12 months. Second, we used an alternative indicator of  
13 baseline health – self-rated health, measured with three categories (excellent/very good, good, fair/poor)  
14 – instead of functional limitation, obesity and psychological distress (Model 3). Third, we additionally  
15 controlled for comorbidity using the Charlson index,[16] using all diagnostic codes in the 12 months  
16 prior to the index admission, with scores categorised as 0, 1 or  $\geq 2$ . Fourth, we restricted analysis of the  
17 angina patients to those admitted with a primary diagnosis of unstable angina (ICD-10: I20.0). Further  
18 sensitivity analyses were performed, excluding patients who were aged 85 and older, and then  
19 controlling for additional patient factors of smoking, self-rated diabetes, treatment for high blood  
20 pressure, treatment for high cholesterol, and family history of heart disease.  
21  
22  
23  
24  
25  
26  
27  
28  
29  
30  
31

32 Analyses were performed using Stata 14.[17]  
33

34 The conduct of the 45 and Up Study was approved by the University of New South Wales  
35 Human Research Ethics Committee. Ethics approval for this study was obtained from the Australian  
36 National University Human Ethics Committee (2015/513) and the NSW Population and Health Services  
37 Research Ethics Committee (HREC/10/CIPHS/33; CI NSW Study Reference 2010/05/234).  
38  
39  
40  
41  
42  
43  
44

### 45 **Patient and Public Involvement**

46 The 45 and Up Study has involved community and consumer representation from its inception, through  
47 its early-phase Community and Ethical Oversight Committee, and through engagement with its  
48 participants, who constitute 10% of the New South Wales general population in the target age range.  
49 Participants are regularly informed of study projects through newsletters and the Study website. The  
50 specific analyses in this project are part of a general initiative from the Heart Foundation of Australia  
51 on women and heart disease and have received consumer input through this organisation. Preliminary  
52  
53  
54  
55  
56  
57  
58  
59  
60



1  
2  
3 results were presented at a Heart Foundation event involving the general public, and further  
4  
5 dissemination of results to the public are expected.  
6  
7  
8

## 9 10 **RESULTS**

11  
12 A total of 9,037 patients were included in the study, 4,580 admitted with AMI and 4,457 admitted with  
13  
14 angina. There were no patients in the sample who had IHD as a primary diagnosis and angina as a  
15  
16 secondary diagnosis. Sample characteristics are shown in Table 1. The profiles of patients within the  
17  
18 AMI and angina groups were similar, with a few exceptions. Notably, those in the angina group were  
19  
20 less likely to be aged 85 and over (8.56% vs 19.4%), and more likely to have private health insurance  
21  
22 at baseline (64.6% vs 56.9%) than those in the AMI group. There was a greater percentage of men  
23  
24 within both AMI and angina groups, 63.6% and 56.2% respectively.  
25  
26  
27  
28  
29  
30  
31  
32  
33  
34  
35  
36  
37  
38  
39  
40  
41  
42  
43  
44  
45  
46  
47  
48  
49  
50  
51  
52  
53  
54  
55  
56  
57  
58  
59  
60

**Table 1:** Characteristics of patients admitted to hospital with acute myocardial infarction (AMI) or angina by sex

|                                      | AMI Sample (n=4,580) |      |       |      | Angina Sample (n=4,457) |      |       |      |
|--------------------------------------|----------------------|------|-------|------|-------------------------|------|-------|------|
|                                      | Men                  |      | Women |      | Men                     |      | Women |      |
|                                      | n                    | %    | n     | %    | n                       | %    | n     | %    |
| <b>Total</b>                         | 2911                 | 63.6 | 1669  | 36.4 | 2503                    | 56.2 | 1954  | 43.8 |
| <b>Age at admission</b>              |                      |      |       |      |                         |      |       |      |
| 45-54                                | 190                  | 6.5  | 80    | 4.8  | 152                     | 6.1  | 151   | 7.7  |
| 55-64                                | 685                  | 23.5 | 277   | 16.6 | 628                     | 25.1 | 499   | 25.5 |
| 65-74                                | 807                  | 27.7 | 414   | 24.8 | 897                     | 35.8 | 622   | 31.8 |
| 75-84                                | 757                  | 26.0 | 481   | 28.8 | 634                     | 25.3 | 493   | 25.2 |
| 85+                                  | 472                  | 16.2 | 417   | 25.0 | 192                     | 7.7  | 189   | 9.7  |
| <b>Region of residence</b>           |                      |      |       |      |                         |      |       |      |
| Major city                           | 1485                 | 51.0 | 807   | 48.4 | 1321                    | 52.8 | 972   | 49.7 |
| Inner regional                       | 1025                 | 35.2 | 629   | 37.7 | 886                     | 35.4 | 717   | 36.7 |
| Regional/remote                      | 354                  | 12.2 | 200   | 12.0 | 259                     | 10.4 | 237   | 12.1 |
| <b>Highest qualification</b>         |                      |      |       |      |                         |      |       |      |
| No school certificate                | 417                  | 14.3 | 357   | 21.4 | 305                     | 12.2 | 326   | 16.7 |
| School/ certificate/ diploma         | 1923                 | 66.1 | 1085  | 65.0 | 1629                    | 65.1 | 1310  | 67.0 |
| Tertiary degree                      | 497                  | 17.1 | 175   | 10.5 | 502                     | 20.1 | 276   | 14.1 |
| <b>Country of birth</b>              |                      |      |       |      |                         |      |       |      |
| Australia/ NZ                        | 2142                 | 73.6 | 1323  | 79.3 | 1888                    | 75.4 | 1576  | 80.7 |
| Other                                | 728                  | 25.0 | 327   | 19.6 | 583                     | 23.3 | 353   | 18.1 |
| <b>Marital status</b>                |                      |      |       |      |                         |      |       |      |
| Single                               | 647                  | 22.2 | 750   | 44.9 | 465                     | 18.6 | 638   | 32.7 |
| Married/ de facto                    | 2244                 | 77.1 | 916   | 54.9 | 2011                    | 80.3 | 1313  | 67.2 |
| <b>BMI</b>                           |                      |      |       |      |                         |      |       |      |
| Not obese (BMI<30kg/m <sup>2</sup> ) | 2079                 | 71.4 | 1100  | 65.9 | 1713                    | 68.4 | 1260  | 64.5 |
| Obese (BMI≥30kg/m <sup>2</sup> )     | 625                  | 21.5 | 394   | 23.6 | 619                     | 24.7 | 479   | 24.5 |
| <b>Physical functioning</b>          |                      |      |       |      |                         |      |       |      |
| No or minor limitation               | 1412                 | 48.5 | 469   | 28.1 | 1221                    | 48.8 | 691   | 35.4 |
| Moderate limitations                 | 646                  | 22.2 | 386   | 23.1 | 647                     | 25.9 | 517   | 26.5 |
| Severe limitations                   | 393                  | 13.5 | 392   | 23.5 | 301                     | 12.0 | 373   | 19.1 |
| <b>Psychological distress</b>        |                      |      |       |      |                         |      |       |      |
| Low                                  | 1958                 | 67.3 | 948   | 56.8 | 1681                    | 67.2 | 1131  | 57.9 |
| Moderate                             | 339                  | 11.7 | 205   | 12.3 | 337                     | 13.5 | 273   | 14.0 |
| High                                 | 188                  | 6.5  | 111   | 6.7  | 178                     | 7.1  | 172   | 8.8  |
| <b>Health Insurance</b>              |                      |      |       |      |                         |      |       |      |
| No private health insurance          | 1164                 | 40.0 | 807   | 48.4 | 845                     | 33.8 | 731   | 37.4 |
| Health care/DVA                      | 1746                 | 60.0 | 862   | 51.7 | 1658                    | 66.2 | 1223  | 62.6 |

% of missing cases: AMI sample (men, women): region of residence (1.6, 2.0); highest qualification (2.5, 3.1); country of birth (1.4, 1.1); marital status (0.7, 0.2); BMI (7.1, 10.5); physical limitations (15.8, 25.3); psychological distress (14.6, 24.3); health insurance (<0.1, 0.0). Angina sample (men, women): region of residence (1.5, 1.4); highest qualification (2.7, 2.2); country of birth (1.3, 1.3); marital status (1.1, 0.1); BMI (6.8, 11.0); physical limitations (13.3, 19.1); psychological distress (12.3, 19.3); health insurance (0.0, 0.0).

### Coronary procedures in AMI patients

Among those admitted to hospital with AMI, 69.1% received angiography, 71.6% of men vs 64.7% of women; and 50.4% underwent PCI/CABG, 57.8% vs 37.4% respectively. The proportion of AMI patients who survived the one year follow-up period was 86.9% (88.6% men vs 84.0% women). Among these people, 75.6% received angiography (77.6% v 71.9%), and 55.4% PCI/CABG (63.2% vs 41.0%).

Crude rates per person-year of angiography were 3.45 (3.31-3.60) and 2.62 (2.47-2.78) in men and women respectively; and crude rates of PCI/CABG were 1.73 (1.64-1.81) and 0.77 (0.71-0.83) respectively (Table 2).

Cox models showed angiography rates were similar in men and women, with no difference after adjustment for sociodemographic and health variables (HR=1.00, 0.92-1.08) (Table 2). In contrast, rates for PCI/CABG were around 50% higher in men than women (adjusted HR=1.51, 1.38-1.67).

**Table 2:** Rates of coronary procedures within one year of admission with AMI by sex and associated hazard ratios (n=4,580)

|                    | Procedures/<br>pys | Crude rate per<br>py (95%CI) | Model 1<br>HR (95%CI) | Model 2<br>HR (95%CI) | Model 3<br>HR (95%CI) |
|--------------------|--------------------|------------------------------|-----------------------|-----------------------|-----------------------|
| <b>Angiography</b> |                    |                              |                       |                       |                       |
| Men                | 2085/604.1         | 3.45 (3.31-3.60)             | 1.08 (1.01-1.17)      | 1.02 (0.95-1.10)      | 1.00 (0.92-1.08)      |
| Women              | 1079/411.7         | 2.62 (2.47-2.78)             | 1.00                  | 1.00                  | 1.00                  |
| <b>PCI/CABG</b>    |                    |                              |                       |                       |                       |
| Men                | 1682/975.0         | 1.73 (1.64-1.81)             | 1.62 (1.48-1.78)      | 1.56 (1.42-1.71)      | 1.51 (1.38-1.67)      |
| Women              | 624/814.3          | 0.77 (0.71-0.83)             | 1.00                  | 1.00                  | 1.00                  |

Notes: py: person-year. Model 1 is adjusted for age at first admission. Model 2 is adjusted for age and sociodemographic variables (country of birth, region of residence, highest qualification, health insurance, marital status). Model 3 is adjusted for age, sociodemographic variables and health-related variables (obesity, physical functioning, psychological distress).

### Coronary procedures in angina patients

Among those admitted to hospital with angina, 61.9% received angiography, 67.3% of men vs 54.9% of women; and 33.6% underwent PCI/CABG, 44.6% vs 19.5% respectively. The proportion of angina patients who survived to the end of the one year follow-up period was 97.4% (96.9% men vs 98.0% women). Among these people, 62.4% received angiography (68.1% vs 55.1%), and 33.9% PCI/CABG (45.3% vs 19.4%).

Crude rates for angiography were 2.36 (2.25-2.47) and 1.32 (1.24-1.40) for men and women respectively; and crude rates for PCI/CABG were 0.90 (0.85-0.95) and 0.26 (0.24-0.29) respectively (Table 3).

Cox models showed angiography rates were around 25% higher among men after adjusting for all factors (HR=1.24, 1.14-1.34). Rates for PCI/CABG in men were around 150% times those of women (adjusted HR=2.44, 2.16-2.75).

**Table 3:** Rates of coronary procedures within one year of admission with angina by sex and associated hazard ratios (n=4,457)

|                    | Procedures/<br>pys | Crude rate per<br>py (95%CI) | Model 1<br>HR (95%CI) | Model 2<br>HR (95%CI) | Model 3<br>HR (95%CI) |
|--------------------|--------------------|------------------------------|-----------------------|-----------------------|-----------------------|
| <b>Angiography</b> |                    |                              |                       |                       |                       |
| Men                | 1685/715.0         | 2.36 (2.25-2.47)             | 1.31 (1.21-1.41)      | 1.26 (1.16-1.36)      | 1.24 (1.14-1.34)      |
| Women              | 1072/814.3         | 1.32 (1.24-1.40)             | 1.00                  | 1.00                  | 1.00                  |
| <b>PCI/CABG</b>    |                    |                              |                       |                       |                       |
| Men                | 1117/1242.2        | 0.90 (0.85-0.95)             | 2.57 (2.28-2.88)      | 2.49 (2.21-2.80)      | 2.44 (2.16-2.75)      |
| Women              | 381/1450.8         | 0.26 (0.24-0.29)             | 1.00                  | 1.00                  | 1.00                  |

Notes: py: person-year. Model 1 is adjusted for age at first admission. Model 2 is adjusted for age and sociodemographic variables (country of birth, region of residence, highest qualification, health insurance, marital status). Model 3 is adjusted for age, sociodemographic variables and health-related variables (obesity, physical functioning, psychological distress).

There were no violations of the proportional hazards assumption for the sex variable in the models with 12 months of follow-up.

Sensitivity analyses using a 30-day follow-up period produced almost identical HRs (Supplementary Tables S1-S2). While violations of the proportional hazards assumption were found on testing in both the AMI and angina samples, there were no major violations detected in log-log plots. Hazard ratios were not materially different to those in the main analysis when adjusted for self-rated health as an alternative indicator of health (Tables S3-S4), when additionally adjusted for the Charlson index (Tables S5-S6), or when estimated on a sample restricted to patients admitted with a primary diagnosis of unstable angina (Table S7). Similarly, hazard ratios were not materially different to those in the main analysis when participants 85 and over were excluded from the sample (Tables S8 (AMI patients) and S9 (angina patients)), and when additionally adjusting for smoking, self-rated diabetes,

1  
2  
3 treatment for high blood pressure, treatment for high cholesterol, and family history of heart disease  
4  
5 (Table S10).  
6  
7  
8

## 9 10 **DISCUSSION**

11  
12 Our findings demonstrate clear sex differences in receipt of coronary procedures. Men were more likely  
13 to receive coronary revascularisation (PCI/CABG) for the management of AMI or angina. Differences  
14 in revascularisation rates were most pronounced among those admitted with angina, among whom men  
15 were also more likely to undergo diagnostic angiography.  
16  
17  
18  
19

20  
21 This study uses Australian data, with findings generally consistent with published evidence  
22 internationally. There is evidence from the US and Sweden that men are more likely than women to  
23 receive revascularisation procedures such as PCI or CABG following hospital admission with AMI or  
24 angina.[7, 18] Our finding that rates of PCI/CABG among men were 1.5 and 2.4 times those for women  
25 for AMI and angina respectively, is consistent with the above studies. A cohort study from the United  
26 Kingdom demonstrated this relationship for CABG, with men having twice the odds of receiving CABG  
27 than women (OR=1.90,1.21-3.00), however no difference in overall revascularisation rates was found  
28 (p=0.14).[19] Evidence regarding angiography is less consistent. There is evidence from the US,  
29 including a review, that suggests sex differences exist,[20, 21] however these considered acute coronary  
30 syndrome as a whole, rather than AMI and angina separately. No significant difference was found in  
31 the United Kingdom for receipt of CVD investigations, including angiography.[19] This is consistent  
32 with our findings on angiography in AMI patients, but differ from our findings in angina patients where  
33 we found a 25% difference in rates between men and women.  
34  
35  
36  
37  
38  
39  
40  
41  
42  
43  
44  
45  
46  
47

48  
49 Factors driving the observed sex differences in procedure rates are not known, however likely  
50 contributors include differences in clinical presentation. There are established sex differences in the  
51 pathophysiology, diagnosis and outcome of therapies related to AMI and angina.[7] For example,  
52 greater proportions of small vessel coronary disease among women, including Takotsubo  
53 cardiomyopathy and other forms of myocardial infarction with non-obstructive coronary arteries,[22]  
54 could contribute to lower rates of PCI/CABG following AMI. Previous studies have shown that women  
55  
56  
57  
58  
59  
60

1  
2  
3 who present with AMI or stable angina are more likely to have non-obstructive coronary artery disease  
4 compared to men, i.e. <50% stenosis of coronary arteries.[23,24]  
5  
6

7 Following CABG, women experience higher complication rates and increased mortality  
8 compared to men, a finding that is more pronounced in younger age groups.[6] While this may  
9 contribute to the lower rate of procedures among women, the directionality of this relationship cannot  
10 be assumed.  
11  
12  
13  
14

15 The use of questionnaire data linked to large-scale routine data enabled a wide range of personal  
16 characteristics and other factors to be included in models, such as socio-economic position and physical  
17 functioning, however clinical factors relating to patient presentation and symptom severity were not  
18 available in the dataset. A US review, however, concluded that clinical factors do not fully explain the  
19 discrepancies in procedure rates between sexes.[25] Thus, while we cannot exclude the possibility of  
20 the sex differences representing appropriate clinical care, this seems an unlikely explanation for the  
21 total observed variation in procedure rates, with multiple factors likely at play.[25]  
22  
23  
24  
25  
26  
27  
28  
29

30 Another possible explanation for our findings is unwarranted variation due to discrimination.  
31 This includes the possibility of unconscious gender bias, with one systematic review demonstrating  
32 implicit bias towards patients by healthcare professionals.[26] Australia's universal health system,  
33 providing free access to hospital care, should present few barriers to receiving equitable care. There are  
34 clear guidelines for the use of coronary procedures among patients presenting with AMI, however the  
35 use of procedures for those presenting with angina is not as clear.[27] Sex differences found in receipt  
36 of coronary procedures, particularly in cases of angina, reinforce the suggestion that these differences  
37 reflect an inequality in care. This raises two distinct issues. First, the possible underuse of coronary  
38 procedures in women, which may indicate that the health care needs of a portion of Australians are not  
39 being adequately met, and second, the possible overuse of coronary procedures in men, which raises  
40 the question of waste within a health care system with limited resources.[27]  
41  
42  
43  
44  
45  
46  
47  
48  
49  
50  
51  
52  
53

54 Strengths of this study include the use of population-based survey data linked to routinely  
55 collected data. The number of participants included was relatively large, with virtually complete capture  
56 of procedures. Questionnaire and other data permitting, there was adjustment for a large range of  
57 baseline sociodemographic and health factors (most of which are not included in administrative data).  
58  
59  
60

1  
2  
3 Additionally, the diagnosis of AMI is highly valid within hospital data, with sensitivity and specificity  
4 of  $\geq 86\%$  and a positive predictive value of  $\geq 93\%$ ,<sup>[28]</sup> and high concordance between diagnostic codes  
5 and physician review.<sup>[29]</sup> This is not true for angina however, where concordance is relatively low.<sup>[29]</sup>  
6  
7 This may have led to an over- or underestimation of procedure rates for angina. As only those admitted  
8 to hospital were included in this study, it is possible that some participants with angina, who could  
9 benefit from a coronary procedure, were not captured. While the 45 and Up Study cohort is broadly  
10 representative of the general population, participants are likely to be healthier and have lower  
11 hospitalisation and mortality rates than others in this age group, consistent with the healthy cohort  
12 effect.<sup>[30]</sup> However, while this may mean that the absolute rates of coronary procedures among those  
13 with coronary heart disease in this study differ from those of the general population, internal  
14 comparisons are unlikely to be influenced by this bias, hence relative rates in relation to sex are likely  
15 to remain valid.<sup>[31,32]</sup>  
16  
17  
18  
19  
20  
21  
22  
23  
24  
25  
26  
27  
28  
29  
30

### 31 CONCLUSION

32  
33 Cardiovascular disease is a national health priority for Australia, with substantial morbidity and  
34 mortality. This study showed that men are more likely than women to receive coronary revascularisation  
35 procedures following admission to hospital with an AMI or angina. This relationship was particularly  
36 evident among the angina group, for whom clinical guidelines are less clear. While we cannot exclude  
37 that this discrepancy reflects appropriate care due to differences in clinical presentation, we must  
38 consider the possibility that sex differences, accounting for sociodemographic position and health-  
39 related factors, may indicate that the health care needs of a portion of the Australian population are not  
40 being adequately met. Morbidity and mortality among Australian women may be unnecessarily  
41 increased due to not receiving coronary intervention following AMI or angina. Alternatively, relative  
42 over-use in men cannot be ruled out. Either way, there is potential for health gain in elucidating and  
43 addressing this sex difference in receipt of coronary intervention, increasing awareness and delivery of  
44 best practice care.  
45  
46  
47  
48  
49  
50  
51  
52  
53  
54  
55  
56  
57  
58  
59  
60

## Abbreviations

CVD: Cardiovascular Disease; AMI: Acute Myocardial Infarction; NSW: New South Wales; APDC: NSW Admitted Patients Data Collection; ICD-10-AM: International statistical Classification of Diseases and related health problems, tenth revision, Australian Modification; PCI: Percutaneous Coronary Intervention; CABG: Coronary Artery Bypass Grafting; IHD: Ischaemic Heart Disease; HR: Hazard Ratio; CI: Confidence Interval; BMI: Body Mass Index; PY: person years.

## DECLARATIONS

### Ethics approval

Ethics approvals for this project were obtained from the NSW Population and Health Services Research Ethics Committee, the University of NSW Human Research Ethics Committee and the Australian National University Human Research Ethics Committee. Participants in the 45 and Up Study provided signed consent for linkage of their information to a range of health-related databases.

### Patient and Public Involvement

Not applicable. Patients were not involved in the development of this study.

### Availability of data and material

The datasets used during the current study are available upon application to the Sax Institute ([www.saxinstitute.org.au/our-work/45-up-study](http://www.saxinstitute.org.au/our-work/45-up-study)). To do so, one must have a scientifically sound and feasible research proposal, ethics approval for the proposal, data custodian approval for access to linked data, and be able to meet 45 and Up Study license and SURE user charges.

### Competing interests

The authors declare that they have no competing interests.

### Funding



1  
2  
3 This research was supported by a NSW CVRN Women and Heart Disease grant from the National  
4 Heart Foundation of Australia (101692). EB is supported by the National Health and Medical Research  
5 Council of Australia (1042717).  
6  
7  
8  
9

### 10 11 **Author's contributions**

12  
13 AF provided input into the study design, performed statistical analysis, interpreted the data and drafted  
14 the manuscript. JW provided input into the study design, performed statistical analysis and reviewed  
15 the manuscript. EB provided input into the study design and reviewed the manuscript. WA reviewed  
16 the manuscript. RK conceived and designed the study and assisted in writing the manuscript. All authors  
17 read and approved the final manuscript.  
18  
19  
20  
21  
22  
23  
24  
25

### 26 27 **Acknowledgements**

28 This research was completed using data collected through the 45 and Up Study  
29 (www.saxinstitute.org.au). The 45 and Up Study is managed by the Sax Institute in collaboration with  
30 major partner Cancer Council NSW; and partners: the National Heart Foundation of Australia (NSW  
31 Division); NSW Ministry of Health; NSW Government Family & Community Services – Ageing,  
32 Carers and the Disability Council NSW; and the Australian Red Cross Blood Service. We thank the  
33 many thousands of people participating in the 45 and Up Study. We also acknowledge the assistance of  
34 the Centre for Health Record Linkage.  
35  
36  
37  
38  
39  
40  
41  
42  
43  
44  
45

### 46 47 **REFERENCES**

- 48  
49  
50 1 GBD 2013 Mortality and Causes of Death Collaborators. Global, regional, and national age–  
51 sex specific all-cause and cause-specific mortality for 240 causes of death, 1990–2013: a  
52 systematic analysis for the Global Burden of Disease Study 2013. *Lancet* 2015;385:117-71 doi:  
53 10.1016/S0140-6736(14)61682-2.  
54  
55  
56  
57 2 Australian Bureau of Statistics. Causes of Death, Australia, 2016. In: Australian Bureau of  
58 Statistics, ed: Cat no. 3303.0. Canberra: ABS 2017.  
59  
60

- 1  
2  
3 Australian Institute for Health and Welfare. Cardiovascular disease: Australian facts 2011. In:  
4 Cardiovascular disease series. Cat. no. CVD 53, ed. Canberra: AIHW 2011.  
5  
6  
7  
8 4 Pagidipati NJ, Peterson ED. Acute coronary syndromes in women and men. *Nat Rev Cardiol*  
9  
10 2016;13:471 10.1038/nrcardio.2016.89.  
11  
12 5 Mehta LS, Beckie TM, DeVon HA, *et al.* Acute Myocardial Infarction in Women: A Scientific  
13  
14 Statement From the American Heart Association *Circulation* 2016;133:00-  
15  
16 10.1161/CIR.0000000000000351.  
17  
18 6 Maas A, Appelman Y. Gender differences in coronary heart disease. *Neth Heart J*  
19  
20 2010;18:598-603 10.1007/s12471-010-0841-y.  
21  
22  
23 7 Bogaev RC. Gender Disparities Across the Spectrum of Advanced Cardiac Therapies: Real or  
24  
25 Imagined? *Curr Cardiol Rep* 2016;18:108 10.1007/s11886-016-0783-0.  
26  
27 8 Graham G. Acute Coronary Syndromes in Women: Recent Treatment Trends and Outcomes.  
28  
29 *Clin Med Insights Cardiol* 2016;10:CMC.S37145 10.4137/CMC.S37145.  
30  
31 9 Australian Institute of Health and Welfare. Women and heart disease: cardiovascular profile of  
32  
33 women in Australia. *Cardiovascular disease series no 33 Cat no CVD 49*. Canberra: AIHW  
34  
35 2010.  
36  
37 10 Banks E, Redman S, Jorm L, *et al.* Cohort profile: the 45 and up study. *Int J Epidemiol*  
38  
39 2008;37:941-7 10.1093/ije/dym184.  
40  
41  
42 11 The Sax Institute. Questionnaires. 2008.  
43  
44 12 Alexandrescu R, Bottle A, Jarman B, *et al.* Current ICD10 codes are insufficient to clearly  
45  
46 distinguish acute myocardial infarction type: a descriptive study. *BMC Health Serv Res*  
47  
48 2013;13:468 [10.1186/1472-6963-13-468](https://doi.org/10.1186/1472-6963-13-468).  
49  
50 13 National Centre for Classification in Health. The Australian classification of health  
51  
52 interventions (ACHI) 6th edition. Tabular list of interventions and alphabetic index of  
53  
54 interventions. Sydney 2007.  
55  
56  
57  
58  
59  
60

- 1  
2  
3 14 Smith DP, Weber MF, Soga K, *et al.* Relationship between Lifestyle and Health Factors and  
4 Severe Lower Urinary Tract Symptoms (LUTS) in 106,435 Middle-Aged and Older Australian  
5 Men: Population-Based Study. *PLoS One* 2014;9:e109278 10.1371/journal.pone.0109278.  
6  
7  
8  
9 15 Kessler RC, Andrews G, Colpe LJ, *et al.* Short screening scales to monitor population  
10 prevalences and trends in non-specific psychological distress. *Psychol Med* 2002;32:959-76  
11  
12  
13 16 Quan H, Li B, Couris CM, *et al.* Updating and Validating the Charlson Comorbidity Index and  
14 Score for Risk Adjustment in Hospital Discharge Abstracts Using Data From 6 Countries. *Am J*  
15 *Epidemiol* 2011;173:676-82 10.1093/aje/kwq433.  
16  
17  
18 17 StataCorp. Stata Statistical Software: Release 14. College Station, TX:StataCorp LP 2015.  
19  
20  
21 18 Haglund B, Köster M, Nilsson T, *et al.* Inequality in access to coronary revascularization in  
22 Sweden. *Scand Cardiovasc J* 2004;38:334-9 10.1080/14017430410021516.  
23  
24  
25 19 Raine RA, Black NA, Bowker TJ, *et al.* Gender differences in the management and outcome of  
26 patients with acute coronary artery disease. *J Epidemiol Community Health* 2002;56:791  
27  
28  
29 20 Redberg RF. Gender differences in acute coronary syndrome: invasive versus conservative  
30 approach. *Cardiol Rev* 2006;14:299-302 10.1097/01.crd.0000240901.89437.b8.  
31  
32  
33 21 Anand SS, Xie CC, Mehta S, *et al.* Differences in the Management and Prognosis of Women  
34 and Men Who Suffer From Acute Coronary Syndromes. *J Am Coll Cardiol* 2005;46:1845-51  
35  
36  
37 10.1016/j.jacc.2005.05.091.  
38  
39  
40 22 Agewall S, Beltrame JF, Reynolds HR, *et al.* ESC working group position paper on myocardial  
41 infarction with non-obstructive coronary arteries. *Eur Heart J* 2017;38:143-53  
42  
43  
44 10.1093/eurheartj/ehw149.  
45  
46  
47 23 Smilowitz NR, Mahajan AM, Roe MT *et al.* Mortality of Myocardial Infarction by Sex, Age,  
48 and Obstructive Coronary Artery Disease Status in the ACTION Registry-GWTG (Acute  
49 Coronary Treatment and Intervention Outcomes Network Registry-Get with the Guidelines).  
50  
51  
52 *Circ Cardiovasc Qual Outcomes*. 2017;10(12):e003443.  
53  
54  
55 24 Shaw LJ, SHAW RE, Merz CN *et al.* Impact of ethnicity and gender differences on  
56 angiographic coronary artery disease prevalence and in-hospital mortality in the American  
57  
58  
59  
60

- 1  
2  
3 College of Cardiology-National Cardiovascular Data Registry. *Circulation*. 2008;117:1787–  
4  
5 1801.  
6  
7  
8 25 Sheifer SE, Escarce JJ, Schulman KA. Race and sex differences in the management of coronary  
9  
10 artery disease. *Am Heart J* 2000;139:848-57 [https://doi.org/10.1016/S0002-8703\(00\)90017-6](https://doi.org/10.1016/S0002-8703(00)90017-6).  
11  
12 26 FitzGerald C, Hurst S. Implicit bias in healthcare professionals: a systematic review. *BMC Med*  
13  
14 *Ethics* 2017;18:19 10.1186/s12910-017-0179-8.  
15  
16 27 Korda RJ, Clements MS, Kelman CW. Universal health care no guarantee of equity:  
17  
18 Comparison of socioeconomic inequalities in the receipt of coronary procedures in patients  
19  
20 with acute myocardial infarction and angina. *BMC Public Health* 2009;9:460 10.1186/1471-  
21  
22 2458-9-460.  
23  
24 28 McCormick N, Lacaille D, Bhole V, *et al*. Validity of Myocardial Infarction Diagnoses in  
25  
26 Administrative Databases: A Systematic Review. *PLoS One* 2014;9(3):e92286  
27  
28 10.1371/journal.pone.0092286.  
29  
30 29 Heckbert SR, Kooperberg C, Safford MM, *et al*. Comparison of Self-Report, Hospital  
31  
32 Discharge Codes, and Adjudication of Cardiovascular Events in the Women's Health Initiative.  
33  
34 *Am J Epidemiol* 2004;160:1152-8 10.1093/aje/kwh314.  
35  
36 37 Lindsted KD, Fraser GE, Steinkohl M, *et al*. Healthy volunteer effect in a cohort study:  
38  
39 Temporal resolution in the adventist health study. *J Clin Epidemiol* 1996;49:783-90  
40  
41 10.1016/0895-4356(96)00009-1.  
42  
43 44 Mealing NM, Banks E, Jorm LR, *et al*. Investigation of relative risk estimates from studies of  
45  
46 the same population with contrasting response rates and designs. *BMC Med Res Methodol*  
47  
48 2010;10:26 10.1186/1471-2288-10-26.  
49  
50 51 Rothman KJ, Gallacher JEJ, Hatch EE. Why representativeness should be avoided. *Int J*  
52  
53 *Epidemiol* 2013;42:1012-4 10.1093/ije/dys223.  
54  
55  
56  
57  
58  
59  
60

## Supplementary Material

**Variation in cardiovascular disease care: An Australian cohort study on sex differences in receipt of coronary procedures**

**Table S1:** Rates of coronary procedures within 30 days of admission with AMI by sex and associated hazard ratios (n=4,580)

|                    | Procedures/<br>pys | Crude rate per py<br>(95%CI) | Model 1<br>HR (95%CI) | Model 2<br>HR (95%CI) | Model 3<br>HR (95%CI) |
|--------------------|--------------------|------------------------------|-----------------------|-----------------------|-----------------------|
| <b>Angiography</b> |                    |                              |                       |                       |                       |
| Men                | 2049/73.7          | 27.8 (26.6-29.0)             | 1.08 (1.00-1.16)      | 1.02 (0.95-1.10)      | 0.99 (0.92-1.07)      |
| Women              | 1060/48.9          | 21.7 (20.4-23.0)             | 1.00                  | 1.00                  | 1.00                  |
| <b>PCI/CABG</b>    |                    |                              |                       |                       |                       |
| Men                | 1624/108.9         | 14.9 (14.2-15.7)             | 1.60(1.46-1.76)*      | 1.54(1.40-1.69)*      | 1.49(1.36-1.65)*      |
| Women              | 600/83.8           | 7.15 (6.60-7.75)             | 1.00                  | 1.00                  | 1.00                  |

Notes: The proportion of AMI patients who survived the 30 day follow-up period was 93.3% (94.4% men vs 91.4% women). py: person-year. Model 1 is adjusted for age at admission (in 5-year age categories). Model 2 is adjusted for age and sociodemographic variables (country of birth, region of residence, highest qualification, health insurance, marital status) Model 3 is adjusted for age, sociodemographic variables and health-related variables (obesity, physical functioning and psychological distress). \* indicates that the proportional hazard assumption is violated.

**Table S2:** Rates of coronary procedures within 30 days of admission with angina by sex and associated hazard ratios (n=4,457)

|                    | Procedures<br>/pys | Crude rate per py<br>(95%CI) | Model 1<br>HR (95%CI) | Model 2<br>HR (95%CI) | Model 3<br>HR (95%CI) |
|--------------------|--------------------|------------------------------|-----------------------|-----------------------|-----------------------|
| <b>Angiography</b> |                    |                              |                       |                       |                       |
| Men                | 1624/74.3          | 21.9 (20.8-23.0)             | 1.30 (1.20-1.40)      | 1.25 (1.15-1.35)      | 1.23 (1.13-1.33)      |
| Women              | 1026/79.0          | 13.3 (12.5-14.1)             | 1.00                  | 1.00                  | 1.00                  |
| <b>PCI/CABG</b>    |                    |                              |                       |                       |                       |
| Men                | 1023/125.9         | 8.13 (7.64-8.64)             | 2.51(2.22-2.84)*      | 2.42(2.14-2.74)*      | 2.36(2.08-2.68)*      |
| Women              | 347/131.3          | 2.64 (2.38-2.94)             | 1.00                  | 1.00                  | 1.00                  |

Notes: The proportion of angina patients who survived the 30 day follow-up period was 99.6% (99.5% men vs 99.6% women). py: person-year. Model 1 is adjusted for age at admission (in 5-year age categories). Model 2 is adjusted for age and sociodemographic variables (country of birth, region of residence, highest qualification, health insurance, marital status) Model 3 is adjusted for age, sociodemographic variables and health-related variables (obesity, physical functioning and psychological distress). \* indicates that the proportional hazard assumption is violated.

**Table S3:** Associated hazard ratios for coronary procedures within one year of admission with AMI by sex using self-rated health only as a health-related variable (n=4,580)

|                    | <b>Model 1<br/>HR (95% CI)</b> | <b>Model 2<br/>HR (95%CI)</b> | <b>Model 3<br/>HR (95%CI)</b> |
|--------------------|--------------------------------|-------------------------------|-------------------------------|
| <b>Angiography</b> |                                |                               |                               |
| Men                | 1.08 (1.01-1.17)               | 1.02 (0.95-1.10)              | 1.02 (0.94-1.10)              |
| Women              | 1.00                           | 1.00                          | 1.00                          |
| <b>PCI/CABG</b>    |                                |                               |                               |
| Men                | 1.62 (1.48-1.78)               | 1.56 (1.42-1.71)              | 1.55 (1.41-1.71)              |
| Women              | 1.00                           | 1.00                          | 1.00                          |

Notes: Model 1 is adjusted for age at admission (in 5-year age categories). Model 2 is adjusted for age and socio-variables (country of birth, region of residence, highest qualification, health insurance, marital status). Model 3 is adjusted for age, sociodemographic variables and health-related variables (self-rated health only).

**Table S4:** Associated hazard ratios for coronary procedures within one year of admission with angina by sex using self-rated health only as a health-related variable (n=4,457)

|                    | <b>Model 1<br/>HR (95% CI)</b> | <b>Model 2<br/>HR (95%CI)</b> | <b>Model 3<br/>HR (95%CI)</b> |
|--------------------|--------------------------------|-------------------------------|-------------------------------|
| <b>Angiography</b> |                                |                               |                               |
| Men                | 1.31 (1.21-1.41)               | 1.26 (1.16-1.36)              | 1.25 (1.16-1.36)              |
| Women              | 1.00                           | 1.00                          | 1.00                          |
| <b>PCI/CABG</b>    |                                |                               |                               |
| Men                | 2.57 (2.28-2.88)               | 2.49 (2.21-2.80)              | 2.50 (2.22-2.81)              |
| Women              | 1.00                           | 1.00                          | 1.00                          |

Notes: Model 1 is adjusted for age at admission (in 5-year age categories). Model 2 is adjusted for age and sociodemographic variables (country of birth, region of residence, highest qualification, health insurance, marital status). Model 3 is adjusted for age, sociodemographic variables and health-related variables (self-rated health only).

**Table S5:** Associated hazard ratios for coronary procedures within one year of admission with AMI by sex using the Charlson index in addition to health-related variables used in the main analysis (n=4,580)

|                    | <b>Model 1<br/>HR (95%CI)</b> | <b>Model 2<br/>HR (95%CI)</b> | <b>Model 3<br/>HR (95%CI)</b> |
|--------------------|-------------------------------|-------------------------------|-------------------------------|
| <b>Angiography</b> |                               |                               |                               |
| Men                | 1.08 (1.01-1.17)              | 1.02 (0.95-1.10)              | 1.00 (0.93-1.08)              |
| Women              | 1.00                          | 1.00                          | 1.00                          |
| <b>PCI/CABG</b>    |                               |                               |                               |
| Men                | 1.62 (1.48-1.78)              | 1.56 (1.42-1.71)              | 1.53 (1.39-1.68)              |
| Women              | 1.00                          | 1.00                          | 1.00                          |

Notes: Model 1 is adjusted for age at admission (in 5-year age categories). Model 2 is adjusted for age and sociodemographic variables (country of birth, region of residence, highest qualification, health insurance, marital status). Model 3 is adjusted for age, sociodemographic variables and health-related variables (obesity, physical functioning, psychological distress and the Charlson index).

**Table S6:** Associated hazard ratios for coronary procedures within one year of admission with angina by sex using the Charlson index in addition to health-related variables used in the main analysis (n=4,457)

|                    | <b>Model 1<br/>HR (95%CI)</b> | <b>Model 2<br/>HR (95%CI)</b> | <b>Model 3<br/>HR (95%CI)</b> |
|--------------------|-------------------------------|-------------------------------|-------------------------------|
| <b>Angiography</b> |                               |                               |                               |
| Men                | 1.31 (1.21-1.41)              | 1.26 (1.16-1.36)              | 1.24 (1.14-1.34)              |
| Women              | 1.00                          | 1.00                          | 1.00                          |
| <b>PCI/CABG</b>    |                               |                               |                               |
| Men                | 2.57 (2.28-2.88)              | 2.49 (2.21-2.80)              | 2.46 (2.18-2.77)              |
| Women              | 1.00                          | 1.00                          | 1.00                          |

Notes: Model 1 is adjusted for age at admission (in 5-year age categories). Model 2 is adjusted for age and sociodemographic variables (country of birth, region of residence, highest qualification, health insurance, marital status). Model 3 is adjusted for age, sociodemographic variables and health-related variables (obesity, physical functioning, psychological distress and the Charlson index).

**Table S7:** Rates of coronary procedures within one year of admission with unstable angina only (I20.0) by sex, and associated hazard ratios (n=2,131)

|                    | Procedures<br>/pys | Crude rate per<br>py (95%CI) | Model 1<br>HR (95%CI) | Model 2<br>HR (95%CI) | Model 3<br>HR (95%CI) |
|--------------------|--------------------|------------------------------|-----------------------|-----------------------|-----------------------|
| <b>Angiography</b> |                    |                              |                       |                       |                       |
| Men                | 672/423.5          | 1.59 (1.47-1.71)             | 1.26 (1.12-1.42)      | 1.25 (1.11-1.41)      | 1.24 (1.10-1.40)      |
| Women              | 468/444.2          | 1.05 (0.96-1.15)             | 1.00                  | 1.00                  | 1.00                  |
| <b>PCI/CABG</b>    |                    |                              |                       |                       |                       |
| Men                | 420/650.1          | 0.64 (0.59-0.71)             | 2.52 (2.09-3.04)      | 2.50 (2.07-3.03)      | 2.50 (2.06-3.02)      |
| Women              | 151/729.8          | 0.21 (0.18-0.24)             | 1.00                  | 1.00                  | 1.00                  |

Notes: py: person-year. Model 1 is adjusted for age at admission (in 5-year age categories). Model 2 is further adjusted for country of birth, region of residence, highest qualification, marital status and health insurance. Model 3 is further adjusted for obesity, physical functioning and psychological distress.

**Table S8:** Rates of coronary procedures within one year of admission with AMI by sex and associated hazard ratios, excluding those aged 85 years and over (n=3691)

|                    | Procedures/<br>pys | Crude rate per<br>py (95%CI) | Model 1<br>HR (95%CI) | Model 2<br>HR (95%CI) | Model 3<br>HR (95%CI) |
|--------------------|--------------------|------------------------------|-----------------------|-----------------------|-----------------------|
| <b>Angiography</b> |                    |                              |                       |                       |                       |
| Men                | 1891/438.3         | 4.31 (4.12-4.51)             | 1.08 (0.99-1.16)      | 1.03 (0.95-1.12)      | 1.02 (0.94-1.1)       |
| Women              | 912/258.9          | 3.52 (3.3-3.76)              | 1.00                  | 1.00                  | 1.00                  |
| <b>PCI/CABG</b>    |                    |                              |                       |                       |                       |
| Men                | 1543/767.2         | 2.01 (1.91-2.11)             | 1.69 (1.53-1.87)      | 1.65 (1.49-1.82)      | 1.61 (1.46-1.79)      |
| Women              | 517/608.8          | 0.85 (0.78-0.93)             | 1.00                  | 1.00                  | 1.00                  |

Notes: py: person-year. Model 1 is adjusted for age at first admission. Model 2 is adjusted for age and sociodemographic variables (country of birth, region of residence, highest qualification, health insurance, marital status). Model 3 is adjusted for age, sociodemographic variables and health-related variables (obesity, physical functioning, psychological distress).

**Table S9:** Rates of coronary procedures within one year of admission with angina by sex and associated hazard ratios, excluding those aged 85 years and over (n=4076)

|                    | Procedures/<br>pys | Crude rate per<br>py (95%CI) | Model 1<br>HR (95%CI) | Model 2<br>HR (95%CI) | Model 3<br>HR (95%CI) |
|--------------------|--------------------|------------------------------|-----------------------|-----------------------|-----------------------|
| <b>Angiography</b> |                    |                              |                       |                       |                       |
| Men                | 1603/629.1         | 2.55 (2.43-2.68)             | 1.29 (1.19-1.4)       | 1.25 (1.16-1.36)      | 1.24 (1.14-1.34)      |
| Women              | 1010/707.2         | 1.43 (1.34-1.52)             | 1.00                  | 1.00                  | 1.00                  |
| <b>PCI/CABG</b>    |                    |                              |                       |                       |                       |
| Men                | 1066/1131.6        | 0.94 (0.89-1.00)             | 2.65 (2.35-2.99)      | 2.57 (2.28-2.91)      | 2.53 (2.23-2.86)      |
| Women              | 347/1322.5         | 0.26 (0.24-0.29)             | 1.00                  | 1.00                  | 1.00                  |

Notes: py: person-year. Model 1 is adjusted for age at first admission. Model 2 is adjusted for age and sociodemographic variables (country of birth, region of residence, highest qualification, health insurance, marital status). Model 3 is adjusted for age, sociodemographic variables and health-related variables (obesity, physical functioning, psychological distress).



**Table S10:** Associated hazard ratios for coronary procedures within one year of admission with AMI (n=4,580) or angina (n=4,457) by sex, adjusted for age, sociodemographic variables and health-related variables including cardiovascular risk factors

|                    | <b>AMI<br/>HR (95%CI)</b> | <b>Angina<br/>HR (95%CI)</b> |
|--------------------|---------------------------|------------------------------|
| <b>Angiography</b> |                           |                              |
| Men                | 1.01 (0.93-1.09)          | 1.24 (1.14-1.34)             |
| Women              | 1.00                      | 1.00                         |
| <b>PCI/CABG</b>    |                           |                              |
| Men                | 1.52 (1.38-1.67)          | 2.45 (2.17-2.76)             |
| Women              | 1.00                      | 1.00                         |

Notes: Model 1 is adjusted for age at admission (in 5-year age categories). Model 2 is adjusted for age and socio-variables (country of birth, region of residence, highest qualification, health insurance, marital status). Model 3 is adjusted for age, sociodemographic variables health-related variables (obesity, physical functioning, psychological distress), and CVD risk factors (smoking, self-rated diabetes, treated for high blood pressure, treated for high cholesterol and family history of heart disease).

## STROBE Statement—checklist of items that should be included in reports of observational studies

|                              | Item No | Recommendation                                                                                                                                                                       | Manuscript page no. |
|------------------------------|---------|--------------------------------------------------------------------------------------------------------------------------------------------------------------------------------------|---------------------|
| <b>Title and abstract</b>    | 1       | (a) Indicate the study's design with a commonly used term in the title or the abstract                                                                                               | 1                   |
|                              |         | (b) Provide in the abstract an informative and balanced summary of what was done and what was found                                                                                  | 2                   |
| <b>Introduction</b>          |         |                                                                                                                                                                                      |                     |
| Background/rationale         | 2       | Explain the scientific background and rationale for the investigation being reported                                                                                                 | 4                   |
| Objectives                   | 3       | State specific objectives, including any prespecified hypotheses                                                                                                                     | 4                   |
| <b>Methods</b>               |         |                                                                                                                                                                                      |                     |
| Study design                 | 4       | Present key elements of study design early in the paper                                                                                                                              | 5-6                 |
| Setting                      | 5       | Describe the setting, locations, and relevant dates, including periods of recruitment, exposure, follow-up, and data collection                                                      | 5-6                 |
| Participants                 | 6       | <i>Cross-sectional study</i> —Give the eligibility criteria, and the sources and methods of selection of participants                                                                | n/a                 |
|                              |         | (b) <i>Cohort study</i> —For matched studies, give matching criteria and number of exposed and unexposed                                                                             | 6                   |
|                              |         | <i>Case-control study</i> —For matched studies, give matching criteria and the number of controls per case                                                                           |                     |
| Variables                    | 7       | Clearly define all outcomes, exposures, predictors, potential confounders, and effect modifiers. Give diagnostic criteria, if applicable                                             | 6-7                 |
| Data sources/<br>measurement | 8       | For each variable of interest, give sources of data and details of methods of assessment (measurement). Describe comparability of assessment methods if there is more than one group | 6-7                 |
| Bias                         | 9       | Describe any efforts to address potential sources of bias                                                                                                                            | 7-8                 |
| Study size                   | 10      | Explain how the study size was arrived at                                                                                                                                            | 6                   |
| Quantitative variables       | 11      | Explain how quantitative variables were handled in the analyses. If applicable, describe which groupings were chosen and why                                                         | 7                   |
| Statistical methods          | 12      | (a) Describe all statistical methods, including those used to control for confounding                                                                                                | 7-8                 |
|                              |         | (b) Describe any methods used to examine subgroups and interactions                                                                                                                  | n/a                 |
|                              |         | (c) Explain how missing data were addressed                                                                                                                                          | 8                   |
|                              |         | <i>Cross-sectional study</i> —If applicable, describe analytical methods taking account of sampling strategy                                                                         | n/a                 |
|                              |         | (e) Describe any sensitivity analyses                                                                                                                                                | 8                   |

Continued on next page

| <b>Results</b>           |    |                                                                                                                                                                                                              | <b>Manuscript page no.</b>  |
|--------------------------|----|--------------------------------------------------------------------------------------------------------------------------------------------------------------------------------------------------------------|-----------------------------|
| Participants             | 13 | (a) Report numbers of individuals at each stage of study—eg numbers potentially eligible, examined for eligibility, confirmed eligible, included in the study, completing follow-up, and analysed            | 9                           |
|                          |    | (b) Give reasons for non-participation at each stage                                                                                                                                                         | n/a                         |
|                          |    | (c) Consider use of a flow diagram                                                                                                                                                                           | n/a                         |
| Descriptive data         | 14 | (a) Give characteristics of study participants (eg demographic, clinical, social) and information on exposures and potential confounders                                                                     | 9                           |
|                          |    | (b) Indicate number of participants with missing data for each variable of interest                                                                                                                          | 10 (Table 1)                |
|                          |    | (c) <i>Cohort study</i> —Summarise follow-up time (eg, average and total amount)                                                                                                                             | -                           |
| Outcome data             | 15 | <i>Cohort study</i> —Report numbers of outcome events or summary measures over time                                                                                                                          | 11-12 (Tables 2 and 3)      |
|                          |    | <i>Case-control study</i> —Report numbers in each exposure category, or summary measures of exposure                                                                                                         | n/a                         |
|                          |    | <i>Cross-sectional study</i> —Report numbers of outcome events or summary measures                                                                                                                           | n/a                         |
| Main results             | 16 | (a) Give unadjusted estimates and, if applicable, confounder-adjusted estimates and their precision (eg, 95% confidence interval). Make clear which confounders were adjusted for and why they were included | 11-12 (Tables 2 and 3)      |
|                          |    | (b) Report category boundaries when continuous variables were categorized                                                                                                                                    | n/a                         |
|                          |    | (c) If relevant, consider translating estimates of relative risk into absolute risk for a meaningful time period                                                                                             | n/a                         |
| Other analyses           | 17 | Report other analyses done—eg analyses of subgroups and interactions, and sensitivity analyses                                                                                                               | 12 and Supplementary Tables |
| <b>Discussion</b>        |    |                                                                                                                                                                                                              |                             |
| Key results              | 18 | Summarise key results with reference to study objectives                                                                                                                                                     | 13                          |
| Limitations              | 19 | Discuss limitations of the study, taking into account sources of potential bias or imprecision. Discuss both direction and magnitude of any potential bias                                                   | 15                          |
| Interpretation           | 20 | Give a cautious overall interpretation of results considering objectives, limitations, multiplicity of analyses, results from similar studies, and other relevant evidence                                   | 15                          |
| Generalisability         | 21 | Discuss the generalisability (external validity) of the study results                                                                                                                                        | 15                          |
| <b>Other information</b> |    |                                                                                                                                                                                                              |                             |
| Funding                  | 22 | Give the source of funding and the role of the funders for the present study and, if applicable, for the original study on which the present article is based                                                | 17                          |
